RESEARCH ARTICLE

# Understanding the reminiscence bump: A systematic review

Khadeeja Munawar<sup>1,2</sup>, Sara K. Kuhn<sup>3</sup>, Shamsul Haque<sup>1\*</sup>

**1** Department of Psychology, Jeffrey Cheah School of Medicine and Health Sciences, Monash University Malaysia, Jalan Lagoon Selatan, Bandar Sunway, Subang Jaya, Selangor, Malaysia, **2** Department of Psychology, University of Wah, Wah Cantt, Pakistan, **3** Department of Teaching and Learning, College of Education and Human Development, University of North Dakota, Grand Forks, North Dakota, United States of America

☞ These authors contributed equally to this work.

\* [shamsul@monash.edu](mailto:shamsul@monash.edu)

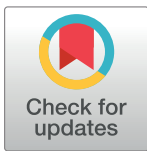

**OPEN ACCESS**

**Citation:** Munawar K, Kuhn SK, Haque S (2018) Understanding the reminiscence bump: A systematic review. PLoS ONE 13(12): e0208595. <https://doi.org/10.1371/journal.pone.0208595>

**Editor:** Maria Semkowska, University of Limerick, IRELAND

**Received:** March 14, 2018

**Accepted:** November 20, 2018

**Published:** December 11, 2018

**Copyright:** © 2018 Munawar et al. This is an open access article distributed under the terms of the [Creative Commons Attribution License](https://creativecommons.org/licenses/by/4.0/), which permits unrestricted use, distribution, and reproduction in any medium, provided the original author and source are credited.

**Data Availability Statement:** All relevant data are within the paper and its Supporting Information files.

**Funding:** Khadeeja Munawar was supported by a Monash University Malaysia Higher Degree by Research Scholarship. The authors acknowledge Global Asia in the 21st Century (GA21) Platform at Monash University Malaysia for the open access publication funding support. The funders had no role in study design, data collection and analysis, decision to publish, or preparation of the manuscript.

## Abstract

One of the most consistently observed phenomena in autobiographical memory research is the reminiscence bump: a tendency for middle-aged and elderly people to access more personal memories from approximately 10–30 years of age. This systematic review (PROSPERO 2017:CRD42017076695) aimed to synthesize peer-reviewed literature pertaining to the reminiscence bump. The researchers conducted searches in nine databases for studies published between the date of inception of each database and the year 2017. Keywords used included: reminiscence, bump, peak, surge, blip, reminiscence effect, and reminiscence component. Sixty-eight quantitative studies, out of 523, met the inclusion criteria. The researchers implemented a thematic analytic technique for data extraction. Four main themes were generated: methods of memory activation/instruction for life scripts, types of memory/life scripts recalled, location of the reminiscence bump, and theoretical accounts for the bump. The two prevailing methods of memory activation implemented were the cuing method and important memories method. Three types of memories/life scripts were recalled: personal/autobiographical memory, memories for public events, and life script events. The findings illustrate differing temporal periods for the bump: approximately 10–30 years for memories for important events, approximately 5–30 years for memories that were induced by word cues, and 6–39 years for studies using life scripts. In explaining the bump, the narrative/identity account and cultural life script account received the most support.

## Introduction

When examining the life span distribution of autobiographical memories (AMs), three phenomena are revealed. The first is childhood amnesia, or the limited recollection of AMs from a very young age, which is present in the life span retrieval curve as a steadily rising function between 0–8 years of age [1]. The second, the recency effect, dictates that memories recalled by most individuals are of recent events, and the frequency of these memories decline gradually [2]. Lastly, the reminiscence bump—also known as “the bump”—enhances memory recall

**Competing interests:** The authors have declared that no competing interests exist.

from approximately 10–30 years of age by people over the age of 30 [3], and is considered one of the most robust findings in AM research [4]. As the reminiscence bump features deviation from the standard forgetting curve and forgetting functions [2, 3], it is recognized as a peculiar phenomenon and defining feature of AM [2, 3]. The reminiscence bump concept is included in most introductory psychology textbooks due to its significance to AM and the field of cognitive psychology [5–7].

The distribution of AMs across the adult life span is often studied through two major types of cueing techniques: the word cueing method and the important memories method [8]. There are various other methods of activating memories, some of them are; writing home diaries, free-recall of public and private items of news, and answering factual, semantic, general-knowledge, multiple-choice questions about the Academy Awards, the World Series, and current events [9–11]. The word cueing method, originally developed by Francis Galton, was later modified by Crovitz and Schiffman [12, 13]. In this technique, participants retrieve and report memories in response to word cues commonly used in everyday conversation [14–17]. The word cueing method was used rigorously in investigating personal memories during the 1970s and 1980s [12, 18–20]. In the important memories method, participants are instructed to retrieve and report the most important memories from their life [8, 15, 21, 22], especially the vivid ones [23–25].

A significant amount of research emerging in the last two decades, claims that the previously found reminiscence bump in AM also extends to public events [26]. Research shows that public events which occurred during adolescence or early adulthood, approximately from the age of 12 to 29 years, are preferentially recalled [27]. This phenomenon is assessed through two major methodologies: the first asks participants to name significant events from recent history [28], and the second assesses participants' level of factual knowledge of specific events [11].

Researchers propose various theoretical accounts to explain the reminiscence bump [8], including the: cognitive account, cognitive abilities account, cultural life script account, and narrative/identity account. The cognitive account postulates that it is simply the novelty of many events occurring in the second and third decades of life that is the major factor leading to enhanced memory recall from this period [29]. According to the cognitive abilities account, people become better equipped to learn, process, and retain information as they move into adolescence and early adulthood due to the maturation of the brain, which leads to maximal cognitive and neurological functioning [30]. According to the cultural life script account, individuals recall more events from the second and third decades of life because of cultural prescriptions and expectations present in the life script [31–33].

The narrative/identity account states that events occurring during adolescence and early adulthood are vital to the development of the individual's adult identity. It is this time when an individual engages in activities and relationships that define who the person will finally become, and how they narrate the stories of their lives [11, 24, 34, 35]. By the time an individual reaches this period of life, the effect of novel experiences on long-term memory, recognition, self-identity, and the development and consolidation of goals, have typically been demonstrated [36, 37]. Experiences acquired during this period are integrated into an individual's lifelong narratives, thus they are more easily recalled later in life. The critical role of early adulthood AMs in identity formation is illustrated in neuropsychological and developmental research [38, 39]. The working self is viewed as playing a major role in organizing AMs; and events during this critical period are used as identity markers for the remainder of life each time AMs are reconstructed [40]. Broadly, the self (or identity) is conceptualized as a multidimensional and complicated set of self-related processes and schema [36, 41, 42].

The research identifies two components of the reminiscence bump: one relating to social identity (i.e. AMs corresponding chiefly to public events individuals experienced when ages 10 to 19 years old), and the other relating to personal identity (i.e. AMs corresponding to personal events that happened between the ages of 20–29) [10]. While social identity develops, individuals associate themselves with specific cultural, social, political, and/or religious groups with whom they have similar goals and desires [43]. Alternatively, during the development of personal identity, desires and goals towards establishing interaction with significant others and forming intimate relationships are developed [36]. The enhanced recollection of social events results in the formation of a reminiscence bump for the ages of 10–19 years, while developing close personal relationships results in a bump for the ages of 20–29 years [10].

Cultural life scripts are stereotypical episodes comprising multiple events in a specific order, with every event allowing succeeding events to occur [44]. They are a series of events which occur in a particular sequence and characterize a prototypical life span in a certain culture [31–33]. The scripts have slots with specific conditions for what is allowed to fill them [45]. The slots in cultural life scripts are culturally significant transitional events likely to occur in a prototypical life span in a certain culture [46]. According to one study, an important life script characteristic is that it represents a culturally shared part of our semantic knowledge; not the outcome of a few personal experiences [32]. Another research study opposes this finding, reporting that cultural life scripts are not part of our shared semantic knowledge [47].

The cultural life script account is based on observation; as reported by Neugarten, Moore and Lowe (1965): Certain age norms are present in every society which organize the expectations, and structure the behaviour, of individuals [46]. There are prescriptive timetables in every culture for the arrangement of significant life events (e.g., finish school, get a job, get married, and have the first child) and the individuals of that particular culture are aware of these age norms [48]. Individuals also manage their own timing for the events on these timetables, and assess if they are achieving significant events earlier, or later, than anticipated [49]. The mechanisms underlying the bump for public events may be different than the mechanisms underlying the bump in autobiographical memory.

The earlier review papers summarized the studies on retention function, reanalyzed the previous findings, reviewed the temporal location of the bump according to different cueing methods, and assessed the current theoretical accounts of the bump in light of the temporal locations of the bump [2, 4, 8, 26]. These studies presented different bump periods for different methods of memory activation. The past reviews summarized the empirical evidence on the bump from non-clinical sample and excluded findings from the clinical samples as well as immigrants as they were interest in "the location of the bump in the general population" (p.67, Koppel & Berntsen, 2015). The differences in location of the bump with respect to cuing methods has already been shown in the past research studies [15, 16]. However, the mechanisms underlying the bump for autobiographical memory activated by different cuing methods (e.g., word cuing method and important memory method) might be different as well as the mechanisms underlying the bump for different types of responses (autobiographical memory vs. Life script events) could also be different.

As the bump is one of the most robust findings in autobiographical memory research, the present review paper added to the empirical body of literature on the bump and attempted to take a step a little further by including and reporting past studies' findings on: general population, clinical samples, immigrants, or any other samples. Furthermore, no restriction was applied on methods of memory activation and research studies assessing the reminiscence bump through methods other than word cuing methods and important methods were also screened for eligibility. The last review paper on bump was published in 2015, therefore, this

review was conducted with the belief that more recent and latest findings from the studies could be assessed and summarized.

The authors attempted to present a thorough summary of all the existing primary research studies on the bump, tried to establish the state of existing knowledge and reviewed the bump for various types of memories apart from autobiographical memories, for instance, flashbulb memories and memories public/private events. The authors developed a clearly defined, pre-determined eligibility and relevance criteria for including research studies; the methodology was reproducible, transparent and systematic; carried out a meticulous search to identify all suitable studies; assessed quality of included studies, and systematically synthesized all the evidence in the form of figures and tables. The authors tried to limit selection bias and random error which have been found to mislead the reviews [50, 51], and attempted to present a reliable summary of the existing knowledge.

In the existing literature, there is currently no systematic review on the reminiscence bump which implements the guidelines proposed in the Preferred Reporting Items for Systematic Reviews and Meta-Analyses (PRISMA) statement [52]. However, a general review of the location of the reminiscence bump across different methods of memory activation provides additional references and descriptions [8]. Although there are several theoretical accounts for the bump for various kinds of memories, and all receive some support in the literature, it is necessary to investigate the relative plausibility of each account. The temporal location of the bump is not presented consistently in studies using varied methods of memory activation. The mechanisms underlying the bump may be different across different memory domains and types of memory assessments.

Discovering the most likely temporal location of the reminiscence bump is one of the authors' aims in conducting the systematic literature review presented in this paper. Another goal of the researchers is to ascertain which theoretical account for the reminiscence bump received the most overarching support, by examining the literature for reported temporal locations of the bump in relation to the methods used to activate different types of memories in participants from various countries.

## Method

The authors implemented the PRISMA statement guidelines in designing this systematic review [52]. After the researchers developed the review protocol, they registered the protocol in PROSPERO (International prospective register of systematic reviews; please see [S1 File](#)) prior to the commencement of the review (registration number CRD42017076695) [53].

## Eligibility criteria

Eligible articles were required to present original research on the bump from qualitative, experimental, quasi-experimental, non-experimental, observational, or mixed-method studies. Neither language of published article, nor sample age group was limited. Only articles published in peer-reviewed or refereed journals were selected. Grey literature and articles that did not mention the reminiscence bump or its synonyms in their titles or abstracts, were excluded. No restriction was imposed on date of publication to allow for a comprehensive background on—and theoretical progression for—the reminiscence bump over time, as presented in the research.

## Systematic search strategy

The researchers conducted a systematic search to locate primary source articles. Synonymic keywords searched in each database, using the Boolean OR operator [54] and wildcard features

(e.g. placing an asterisk at the end of a root word to account for a variety of word endings), included: *reminiscence\**, *bump*, *peak*, *surge*, *blip*, *reminiscence effect\**, and *reminiscence component* (please see [S1 Table](#)). The search strategy combined these synonymic keywords (with OR) to search the following 9 databases for articles published, or added, to the databases between the date of inception of each database and 2017: Ovid MEDLINE, Ovid Embase, Ovid Emcare, CINAHL Plus (EBSCOhost), Proquest Central, PsycInfo, Scopus, Pubmed, and ScienceDirect (please see [S2 Table](#)).

The researchers retrieved a total of 523 records through this search strategy. They then “hand searched” the 523 articles’ reference lists to obtain further relevant studies, yielding 47 additional citations ([Fig 1](#)). After the researchers removed duplicates, 261 articles remained.

The 261 article records were imported into the EndNote reference/citation manager and screened for eligibility/inclusion in the review. The researchers screened titles and abstracts for inclusion criteria, removing 181 studies that did not meet the criteria and retaining 80 full-text articles to assess for eligibility. After assessing the 80 full-text articles, 12 articles were excluded for not meeting inclusion criteria (e.g. not published in peer reviewed journals, or format was a brief report and not a research article). The researchers hand searched the remaining 68 articles’ references for relevant articles. No additional articles were included from this search. The final group of 68 studies was assessed for methodological quality, after which the researchers performed data extraction and synthesis.

### Methodological assessment

The 68 quantitative studies were assessed for quality using the 14 criteria developed by Kmet, Lee, and Cook [55]. No qualitative or mixed-method studies were present. An overall rating (from 0 to 1) was assigned to every study; higher numerical ratings indicated higher quality. Previous systematic reviews employing the QualSyst quality assessment protocol required a minimum threshold score of 0.55 for study inclusion [56]. Other reviews included studies falling within the range of 0.74 to 0.91 [57]. The lowest quality rating of studies included in this review was determined to be 0.54, therefore all studies were considered eligible for inclusion. To minimize the risk of bias, two reviewers worked independently to screen studies and extract and synthesize data. Disagreements were settled by applying the 14 criteria [55] (please see [S3 Table](#)).

### Data collection and extraction

The researchers used forms to extract the data for retrieving relevant information to assess the aims of the review [58]. They placed extracted information under appropriate sections corresponding to: author, year, country; study objective; sample size (N), and findings ([Table 1](#))

### Data synthesis

The researchers employed a narrative synthesis approach to abridge extracted study data. Narrative synthesis was deemed appropriate as it allows for both the synthesis of findings from several studies that use different research designs with varying characteristics of samples, and the application of an overall meaning to the data [115]. Through extraction, formulation (via a data extraction chart), and translation of the data into narrative summaries, the researchers utilized all accessible data. The initial stage of data familiarization occurred through the repeated systematic review of each research article. Formatting initial codes resulted in data refinement and the generation of themes from the data. Before allocating descriptive terms, themes were further refined so that the crux of all themes could be captured. These themes assisted in generating an analytic narrative during the final stage of report writing. Driven by

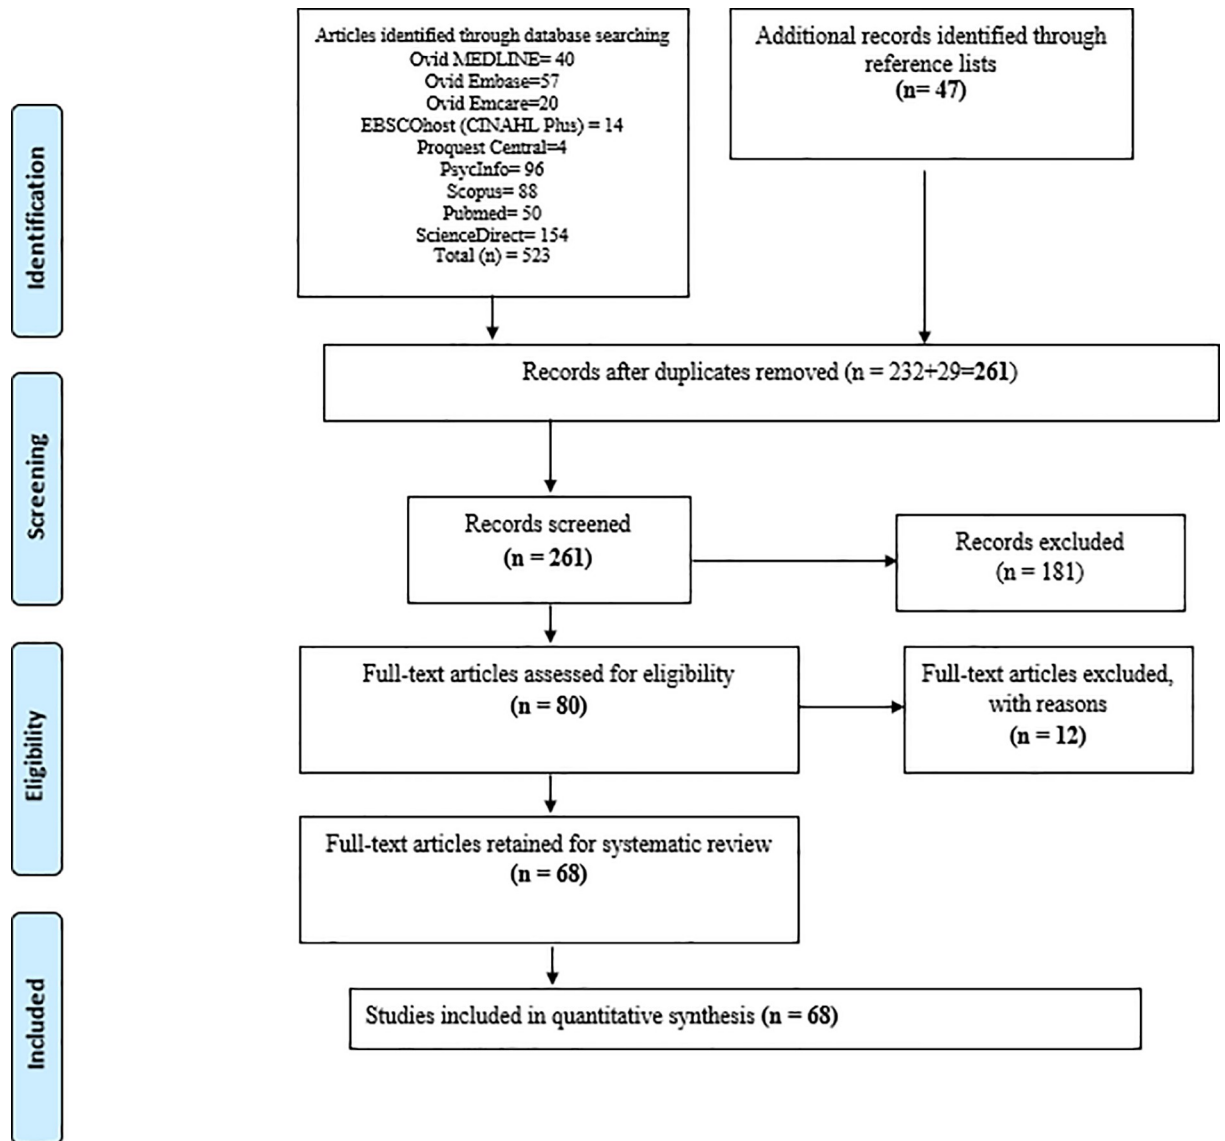

Fig 1. PRISMA flow diagram showing process of study selection for inclusion in systematic review.

<https://doi.org/10.1371/journal.pone.0208595.g001>

the narrative synthesis approach, the data synthesis stage of this systematic review achieved the researchers’ goals of effectively drawing out—and giving meaning to—pertinent data from the research articles (please see [S4 Table](#)).

## Results

### Temporal and geographical representation of studies

The locations of the 68 studies varied: 19 in the U.S.; 9 in Denmark; 8 in the Netherlands; 7 in the United Kingdom; 4 in both Turkey and Japan; 3 in Germany, Canada and France, respectively; and 2 in Australia. One study took place in Bangladesh, Austria, Malaysia, and Trinidad and Tobago, respectively. Two studies included samples from more than one country: the first from Japan, Bangladesh, England, and China; and the second from the Netherlands and the United States (please see [S1 Fig](#)). Dates of published studies ranged from 1988 to 2017: 13

**Table 1. Summary of studies about the reminiscence bump<sup>1</sup> (N = 68).**

| Serial No. | First Author/Year/ Country <sup>2</sup> | Objective                                                                                                                                                                         | Sample size (n)                                                                                                                                                                                                                               | Findings                                                                                                                                                                                                                                                                                                                                                                                                                                                                                                            |
|------------|-----------------------------------------|-----------------------------------------------------------------------------------------------------------------------------------------------------------------------------------|-----------------------------------------------------------------------------------------------------------------------------------------------------------------------------------------------------------------------------------------------|---------------------------------------------------------------------------------------------------------------------------------------------------------------------------------------------------------------------------------------------------------------------------------------------------------------------------------------------------------------------------------------------------------------------------------------------------------------------------------------------------------------------|
| 1.         | Alea, 2014<br>Trinidad and Tobago [59]  | Examining the life-script account for the reminiscence bump                                                                                                                       | N = 100; range: 31–59 years                                                                                                                                                                                                                   | Two reminiscence bumps were found for both positive and negative events: (a) 6–15 years old, and (b) in the mid-twenties. The first bump comprised mostly ordinary events, regardless of participant age. The second contained mostly unusual events, regardless of valence; people ≥40 years exhibited a bump for negative events.                                                                                                                                                                                 |
| 2.         | Berntsen, 2004<br>Denmark [32]          | Replicating earlier findings on age norms for emotional events in a large stratified sample<br>Providing direct evidence for the existence of life scripts for a series of events | Study 1: 1485 respondents (age range 20–99 years)<br>Study 2: 103 undergrads (87 women, 16 men; mean age, 26.4 years; range: 21–51 years)                                                                                                     | Shown an increase in transitional events between 15–30 years old that were associated with narrower age ranges and more positive emotion than events outside this period. Only positive events increased between the ages of 15–30. Evidence of a shared life script for transitional events biased to favor positive events and events expected to occur in the period of the bump. Most positive events were estimated to occur between 15–30 years old; the distribution of negative events was relatively flat. |
| 3.         | Bohn, 2011<br>Denmark [60]              | Examining children’s representations of possible events in their personal futures                                                                                                 | Study 1: 162 middle-class children (mean ages for third graders 10.01, SD = 0.49; mean ages for eighth graders 14.62 years, SD = 0.30; 51% men, 49% women)<br>Study 2: 20 eighth graders (11 men, 9 women; mean age = 14.77 years, SD = 0.40) | Events in these life stories were mostly life-script events, and their distribution showed a clear bump in young adulthood. The events generated consisted mostly of non-life-script events, and those events did not show a bump in young adulthood.                                                                                                                                                                                                                                                               |
| 4.         | Cappeliez, 2008<br>Canada [9]           | Examining older adults’ dreams with content dated during the bump period, first in terms of central concern, and second in terms of type of reminiscence                          | 30 older women (mean age = 65; range = 60–77)                                                                                                                                                                                                 | Dreams were found to be characterized by content related to personal goals and akin to the integrative type of reminiscence, supporting the theory that personal memories of the bump period remain salient—even in the dreams of older adults, because they relate to the development of goals of the self and identity—and that older adults use personal data to (re)construct a coherent and meaningful self.                                                                                                   |
| 5.         | Chu, 2000<br>UK [61]                    | Examining differences in the age distributions of odor-cued and verbal label-cued AMs among older participants                                                                    | Odor condition: 22 subjects (11 men, 11 women; mean age = 69.4)<br>Label condition: 11 subjects (4 men, 7 women; mean age = 69.6)                                                                                                             | The bump for label cues was found to peak between ages 11–25. The odor-cued memory distribution peaked at 6–10 years and decreased linearly thereafter. In the earliest age interval, 6–10 years, the proportion of AMs retrieved in response to odor cues was significantly greater than that for label cues.                                                                                                                                                                                                      |
| 6.         | Conway, 1999<br>Bangladesh [62]         | Identifying the timing of the reminiscence bump in a sample of Bangladeshi people                                                                                                 | 106 participants (80 men and 26 women, mean age = 47)                                                                                                                                                                                         | A reminiscence bump was found for the period 10–30 years. It was prominent in the younger group, but less so in the older group, who also showed a bump from age 35–55. This latter bump corresponded to a period of national conflict between Pakistan and the Bengali people, resulting in the formation of an independent Bangladesh.                                                                                                                                                                            |

(Continued)

Table 1. (Continued)

| Serial No. | First Author/ Year/ Country <sup>2</sup>                    | Objective                                                                                                                                                                                                                       | Sample size (n)                                                                                                                                                                                                                                                                                                      | Findings                                                                                                                                                                                                                                                                                                                                                                                                        |
|------------|-------------------------------------------------------------|---------------------------------------------------------------------------------------------------------------------------------------------------------------------------------------------------------------------------------|----------------------------------------------------------------------------------------------------------------------------------------------------------------------------------------------------------------------------------------------------------------------------------------------------------------------|-----------------------------------------------------------------------------------------------------------------------------------------------------------------------------------------------------------------------------------------------------------------------------------------------------------------------------------------------------------------------------------------------------------------|
| 7.         | Conway, 2005<br>Japan, Bangladesh, England, China, USA [63] | Exploring memory and self-cross-cultural differences, in particular, examining an aspect of AM that is often observed and known to be closely associated with self: the reminiscence bump                                       | 208 participants: 33 from Japan, 40 from Bangladesh, 27 from England, 54 from China, 54 from US. Age range: 38–60 (overall mean age = 52 years)                                                                                                                                                                      | Periods of childhood amnesia and the reminiscence bump were the same across cultures. Memories from the Chinese group consisted of interdependent self-focus (i.e., were of events with a group or social orientation). Memories from the U.S. group showed an independent self-focus (i.e., were of events oriented to the individual).                                                                        |
| 8.         | Copeland, 2009<br>USA [64]                                  | Examining the forgetting curves for information read in a novel                                                                                                                                                                 | 38 participants: 24 undergraduate and graduate students, 14 undergraduates                                                                                                                                                                                                                                           | A clear effect of primacy along with two reminiscence bumps: one observed around the age of 20, typical in studies of the bump; and one bump later in life at the time of an important life transition.                                                                                                                                                                                                         |
| 9.         | Davison, 2008<br>UK [65]                                    | Applying an AM framework to the study of regret                                                                                                                                                                                 | Study 1: 60 participants (ages 60–69; mean age = 65; SD = 3.1)<br>Study 2: 71 participants (45 women; 26 men). Two age groups recruited:<br>• 40s (n = 41); mean age = 44.4; SD = 3.4<br>• 60s (n = 30); mean age = 64; SD = 2.9                                                                                     | There was reminiscence bump for general, but not for specific, regrets. Recent regrets were more likely to be specific than general in nature.                                                                                                                                                                                                                                                                  |
| 10.        | Demiray, 2009<br>Turkey [66]                                | Replicating the reminiscence bump using a life history timeline method<br>Extending reminiscence bump research to a Turkish sample<br>Empirically examining the recently proposed life story account for the reminiscence bump. | 72 participants (40 women and 32 men, ages 52–66; mean age = 58.25; SD = 3.86)                                                                                                                                                                                                                                       | A bump was found between the ages of 10–30 using a life history timeline method. A life story account of the bump is supported by showing that bump memories are perceived as more novel, were more likely to be distinctive events, were rated as more important for identity development, and were more likely to be transitional events than memories from other parts of the lifespan distribution.         |
| 11.        | Denver, 2010<br>USA [67]                                    | Examining flashbulb memories acquired from different points in the lifespan in younger and older adults                                                                                                                         | Study 1: 67 participants: 39 younger adults, ages 20–42 years, mean age = 23.3, and SD = 3.7; and 26 community-dwelling older adults, ages 59–89, mean age = 73.9, and SD = 7.0<br>Study 2: 58 participants: 39 younger adults, mean age = 23.3, and SD = 3.7; and 19 older adults, mean age = 73.7, and SD = 7.6    | Older adults' flashbulb memories created during the reminiscence bump period were very vivid and highly accessible, and showed a clear reminiscence bump between the ages of 10–30 years                                                                                                                                                                                                                        |
| 12.        | Dickson, 2011<br>USA [68]                                   | Examining if a reminiscence bump is evident when memory cues prompt recall of surprising and unexpected events                                                                                                                  | Study 1: College students, ages 17–33 (n = 198). Mean age = 18.67; SD = 1.76<br>Study 2: Older adults, ages 60–93 (n = 259). Mean age = 70.65; SD = 7.77<br>Study 3: College students, ages 17–26 (n = 196). Mean age = 18.59; SD = 0.99<br>Study 4: Older adults, ages 60–89 (n = 227). Mean age = 68.65; SD = 6.81 | Older adults recalled: positive and negative, surprising positive and surprising negative, or highly expected and highly unexpected events. Adults' memory distributions were compared with distributions of predicted life events generated by undergraduates. Reminiscence bumps were found not only for memories of positive and expected events, but also for memories of surprising and unexpected events. |
| 13.        | Ece, 2014<br>Turkey [69]                                    | Exploring the impact of suppressing typical life events on the reminiscence bump in life script and AM distributions                                                                                                            | 142 participants, ages 45–65. (mean age = 51.82; SD = 4.80)                                                                                                                                                                                                                                                          | The reminiscence bump disappeared in AM distribution. In life script distribution, it disappeared from 21–30 years, whereas it was reduced between 16–20 and 31–35 years.                                                                                                                                                                                                                                       |
| 14.        | Elnick, 1999<br>USA [70]                                    | Advancing the understanding of how people represent who they are through AMs                                                                                                                                                    | 220 participants (104 men, 116 women) ages 40–87 (mean age = 59.1; SD = 12.2)                                                                                                                                                                                                                                        | Memories demonstrated the bump in early adulthood. The central domains represented in this era involved events with family and relationships followed by those related to education and work.                                                                                                                                                                                                                   |

(Continued)



Table 1. (Continued)

| Serial No. | First Author/ Year/ Country <sup>2</sup> | Objective                                                                                                                                                                       | Sample size (n)                                                                                                                                                                                                                                                                                             | Findings                                                                                                                                                                                                                                                                                                                                                                                                                                        |
|------------|------------------------------------------|---------------------------------------------------------------------------------------------------------------------------------------------------------------------------------|-------------------------------------------------------------------------------------------------------------------------------------------------------------------------------------------------------------------------------------------------------------------------------------------------------------|-------------------------------------------------------------------------------------------------------------------------------------------------------------------------------------------------------------------------------------------------------------------------------------------------------------------------------------------------------------------------------------------------------------------------------------------------|
| 15.        | Erdoğan, 2008<br>Turkey [71]             | Testing the generality of the life script by looking at the effects of culture, gender, and cohorts                                                                             | 200 participants (114 women, 86 men, ages 18–34 (mean age = 20.08; SD = 2.07)                                                                                                                                                                                                                               | A clear life script was obtained containing more positive than negative events; there was a stronger agreement about the timing of positive, than of negative, events. Many aspects of the life script, but not the bump, changed depending on the age of the individual for whom the script was constructed (newborn vs. elderly).                                                                                                             |
| 16.        | Fitzgerald, 1988<br>USA [24]             | Developing an explanation for the phenomenon of the reminiscence bump                                                                                                           | Study 1: 31 participants (15 men, 16 women) ages 60–75 (mean age = 67.2)<br>Study 2: 51 participants (25 men, 26 women) ages 62–75 (mean age = 68.7)                                                                                                                                                        | Findings revealed that reminiscence effects reflect the availability of a pool of vivid memories from a given era.                                                                                                                                                                                                                                                                                                                              |
| 17.        | Fitzgerald, 1996<br>USA [35]             | Ascertaining the distribution of life story memories for both younger and older adults                                                                                          | Group 1: 45 participants, 23 men and 22 women, ages 30–46 (median age = 36)<br>Group 2: 45 participants, 20 men and 25 women, ages 60–75 (median age = 66)                                                                                                                                                  | Adults reported a large proportion of memories from adolescent and young adult periods. Younger and older adults showed similar patterns of sampling from that period.                                                                                                                                                                                                                                                                          |
| 18.        | Fromholt, 1991<br>Denmark [72]           | Analyzing changes in the way memories are recalled by patients with dementia to identify features of AM function that are especially vulnerable to degenerative brain processes | 60 participants total, ages 71–89.<br>Experimental group: 30 volunteers with dementia (5 men and 25 women; mean age = 80.5).<br>Control group: 30 volunteers (12 men and 18 women; mean age = 78.3)                                                                                                         | The chronological distribution of memories across the life span in both groups showed a peak in adolescence and early adulthood, a decrease in mid-life, and an increase in recent years. This distribution is similar to the chronological pattern reported for vivid memories. The distribution in the demented group was more flat.                                                                                                          |
| 19.        | Fromholt, 2003<br>USA [73]               | Providing information on the influence of age, dementia, and depression on AM in late life                                                                                      | Experiment 1: 15 participants (11 women)<br>Experiment 2: 22 participants (17 women); mean age = 100 years, seven months (range = 100 years, 0 months to 101 years, nine months)                                                                                                                            | The life-narrative method produced relatively more bump memories. The life-narrative distributions were similar to those obtained from 80-year-old adults without clinical symptoms and from 80-year-old Alzheimer's dementia and depression patients. The centenarians had an additional 20-year period of relatively low recall between the bump, recency components, more emotionally neutral memories and fewer and less detailed memories. |
| 20.        | Gidron, 2007<br>Netherlands [74]         | Exploring the relationship between overgeneral memory biases in the context of the distribution of AMs found in later age, and depression                                       | 25 participants (12 men, 13 women), ranging in age from 65–89 (mean age = 77.92; SD = 6.5 years)                                                                                                                                                                                                            | The reminiscence bump was found to be significantly and inversely correlated with depression.                                                                                                                                                                                                                                                                                                                                                   |
| 21.        | Glück, 2007<br>Austria [22]              | Addressing the theoretical issue of causes for the reminiscence bump<br>Examining the adequacy/inadequacy of the life story account                                             | 659 participants, ages 50–90 years. Three age groups: ages 50–59 (n = 285); ages 60–69 (n = 195); and ages 70–90 (n = 171)                                                                                                                                                                                  | Only high perceived-control positive events showed a bump, and were rated as more influential on later development than were events showing any other combination of valence and perceived control.                                                                                                                                                                                                                                             |
| 22.        | Haque, 2010<br>Malaysia [75]             | Explaining the reminiscence bump for emotionally charged AMs among Malaysian participants                                                                                       | Study 1: 189 middle-aged older participants. Women = 111 (ages 50–76; mean age = 56.0 years; SD = 6.0). Men = 78 (ages 50–90; mean age = 58.0, SD = 8.0)<br>Study 2: 92 undergraduate students. Women = 73, Men = 19. Ages 17–23 (mean age of women = 19.74, SD = 1.21; mean age of men = 19.53, SD = 0.77) | The findings revealed bumps in both life script and retrieval curves for the memories deemed to be the happiest, most important, most in love, and most jealous. A reminiscence bump was also noted for success, although it occurred later in the lifespan than other bumps.                                                                                                                                                                   |

(Continued)

Table 1. (Continued)

| Serial No. | First Author/ Year/ Country <sup>2</sup>  | Objective                                                                                                                                                  | Sample size (n)                                                                                                                                                                                                                                                                                                                                                              | Findings                                                                                                                                                                                                                                                                                                                                                                                 |
|------------|-------------------------------------------|------------------------------------------------------------------------------------------------------------------------------------------------------------|------------------------------------------------------------------------------------------------------------------------------------------------------------------------------------------------------------------------------------------------------------------------------------------------------------------------------------------------------------------------------|------------------------------------------------------------------------------------------------------------------------------------------------------------------------------------------------------------------------------------------------------------------------------------------------------------------------------------------------------------------------------------------|
| 23.        | Holmes, 1999<br>England [10]              | Examining differences between age groups in both type and content of knowledge recalled from the period of ages 10–19 years old                            | Experiment 1: 100 participants, ages 30–70, separated into four groups of 25 by age: 30–39 (mean age = 35), 40–49 (mean age = 45) 50–59 (mean age = 55), and 60–70 (mean age = 64)<br>Experiment 2: 100 participants, ages 30–70 (mean age = 50) in four groups of 25 by age: 30–39 (mean age = 36), 40–49 (mean age = 45), 50–59 (mean age = 54), and 60–70 (mean age = 64) | The peak recall for public news items was found in the period from ages 10–19, whereas peak recall of private news items occurred in the period from ages 20–29. These two components of the reminiscence bump reflect, respectively, a period of formation of generation identity in the second decade of life and a period of formation of intimate relationships in the third decade. |
| 24.        | Jansari, 1996<br>UK [76]                  | Exploring the reminiscence bump: the disproportionately higher recall of early-life memories by older adults                                               | Experiment 1: 82 participants (63 women; 19 men). Three age groups: 36–40, 46–50, & 56–60 (mean ages = 18.2, 49.2, & 66.8, respectively)<br>Experiment 2: 24 new participants 45–60 years of age (mean age = 52.3 years)                                                                                                                                                     | Findings of experiment 1 revealed the appearance of a bump in younger participants. In experiment 2, memories from early life were more easily retrieved, but it was not due to differences in subjective qualities. A higher proportion of memories for first-time events were identified from early life, and they were more easily retrieved.                                         |
| 25.        | Janssen, 2003<br>Netherlands [77]         | Researching the distribution of AM through the Galton-Crovitz cueing method                                                                                | 1,587 participants (827 men; 760 women), ages 10–70 (mean age = 39.89). Six age groups.                                                                                                                                                                                                                                                                                      | Findings revealed a bump from 13–18 years old, which is an estimate for the age interval during which the expected number of encoded memory representations reaches its highest value.                                                                                                                                                                                                   |
| 26.        | Janssen, 2005<br>Netherlands and USA [78] | Investigating the age distribution of AM using the Galton-Crovitz method through the Internet                                                              | 2,000 participants, ages 11–70. Mean age = 38.38 (SD = 13.74)                                                                                                                                                                                                                                                                                                                | Strong evidence was found for a bump with peaks at ages 15–18 for men, and 13–14 for women. Americans showed a tendency to report older memories than Dutch participants. Age group and level of education did not influence lifetime encoding information.                                                                                                                              |
| 27.        | Janssen, 2007<br>Netherlands [79]         | Examining if the bump is caused by differential encoding or re-sampling                                                                                    | Participants from the Netherlands (n = 1,279), U.S. (n = 406), U.K. (n = 104), Belgium (n = 66), Australia (n = 64), Canada (n = 54), and other countries (n = 188). Mean age = 35.57 (SD = 14.46)                                                                                                                                                                           | Temporal distributions showed reminiscence bumps. The distribution of favorite records had the largest reminiscence bump. The results suggest that differential encoding initially causes the reminiscence bump and that re-sampling increases the bump further.                                                                                                                         |
| 28.        | Janssen, 2008<br>Netherlands [80]         | Examining memory for public events to investigate why personal events are encoded better in adolescence and early adulthood than in other lifetime periods | 1,334 participants, ages 16–75. Mean age = 42.9. Six age groups: 16–25 (n = 266), 26–35 (n = 236), 36–45 (n = 259), 46–55 (n = 338), 56–65 (n = 179), 66–75 (n = 56)                                                                                                                                                                                                         | The participants answered questions correctly about events that occurred in the period in which they were between 10–25 years old. The bump was more pronounced for cued recall than for recognition.                                                                                                                                                                                    |
| 29.        | Janssen, 2008<br>Netherlands [30]         | Exploring the causes of the reminiscence bump                                                                                                              | 3,492 participants, ages 16–75. Mean age = 42.3 (SD = 14.9)                                                                                                                                                                                                                                                                                                                  | The reminiscence bump consisted of relatively fewer novel, emotional, and important positive or negative events.                                                                                                                                                                                                                                                                         |
| 30.        | Janssen, 2011<br>Japan [81]               | Investigating the temporal distribution of word cued memories and how it is affected by the increased recall of recent events                              | 50 participants, ages 16–65.<br>Experiment: Polish participants (N = 1,089), more young adults (16–40 years, n = 961) than middle-aged adults (41–65 years, n = 128)                                                                                                                                                                                                         | A model was proposed that: estimates a retention function based on the 10 most recent years from the observed distributions, and divides the observed distributions by predictions derived from the estimated retention function. It demonstrated that AM temporal distribution of participants younger than 40 contained the reminiscence bump.                                         |

(Continued)

Table 1. (Continued)

| Serial No. | First Author/ Year/ Country <sup>2</sup> | Objective                                                                                                                                                                                   | Sample size (n)                                                                                                                                                                                                                     | Findings                                                                                                                                                                                                                                                                                                        |
|------------|------------------------------------------|---------------------------------------------------------------------------------------------------------------------------------------------------------------------------------------------|-------------------------------------------------------------------------------------------------------------------------------------------------------------------------------------------------------------------------------------|-----------------------------------------------------------------------------------------------------------------------------------------------------------------------------------------------------------------------------------------------------------------------------------------------------------------|
| 31.        | Janssen, 2011<br>Netherlands [82]        | Examining whether AMs from adolescence and early adulthood are recollected more than memories from other lifetime periods                                                                   | 2,341 participants (739 men; 1602 women) ages 16–75 (mean age = 47.77; SD = 14.31)                                                                                                                                                  | Most memories came from the period of 6–20 years old, showing a bump. The memories from this period were not relived more often, or recalled more vividly, compared to recent events. Older adults reported a stronger recollective experience than younger adults.                                             |
| 32.        | Janssen, 2012<br>Netherlands [83]        | Examining the robustness of the reminiscence bump by looking at participants' judgments about the quality of football players                                                               | 619 participants, ages 16–80. Mean age = 47.74 (SD = 15.31). Seven age cohorts by birth year: 1926–1935, n = 20; 1936–1945, n = 69; 1946–1955, n = 162; 1956–1965, n = 152; 1966–1975, n = 87; 1976–1985, n = 71; 1986–1995, n = 58 | Participants frequently named football players who reached the midpoint of their career when the participants were adolescents (mode = 17). The results indicate that the reminiscence bump can also be identified outside the AM domain.                                                                       |
| 33.        | Janssen, 2015<br>Australia [84]          | Examining if people have culturally shared expectations about the timing of important public events                                                                                         | Condition 1: 107 participants, ages 16–28; 83.2% women (mean age = 18.87; SD = 2.01)<br>Condition 2: 102 participants, ages 17–29; 73.5% women. (mean age = 20.96; SD = 3.00)                                                       | No support for cultural life scripts as an explanation for the bump in the memory for public events was found. Most public events were expected to occur before the reminiscence bump period.                                                                                                                   |
| 34.        | Ju, 2016<br>USA [85]                     | Examining the reminiscence bump in a new context: reactions to nostalgic advertising                                                                                                        | 168 participants sampled to represent two age cohorts: Gen X (n = 89); Boomers (n = 79). Gen X mean age = 33.28 (SD = 2.52), and late-stage boomers mean age = 53.47 (SD = 2.36)                                                    | Supports hypotheses that bump focused advertisements (ads) show higher diachronic relevance and elicit greater purchase intent than either non-bump past ads or present-focused ads. Greater purchase intent after viewing the bump-focused ad was shown to be mediated by the diachronic relevance of the ads. |
| 35.        | Kawasaki, 2011<br>Japan [86]             | Examining the temporal distribution of AMs of Japanese young and middle-aged adults                                                                                                         | 252 participants, ages 16–65                                                                                                                                                                                                        | A bump was identified in memories of young adults. The bump location of for young adults was 5–13 years of age, and for middle-aged adults, 6–15.                                                                                                                                                               |
| 36.        | Koppel, 2014<br>USA [87]                 | Testing the existence of normative youth bias                                                                                                                                               | Study 1: 200 participants ages 18–81, mean age = 38.1, SD = 16.1 (63.0% men; 37.0% women)<br>Study 2: 198 participants ages 18–71, mean age = 32.7, SD = 12.4 (60.6% men, 37.9% women)                                              | A marked peak was found in young adulthood (i.e., ages 11–30), when the most important public event of a hypothetical person's life would be expected to occur.                                                                                                                                                 |
| 37.        | Koppel, 2016<br>Denmark [88]             | Comparing the bump for AMs versus the bump for memories of public events                                                                                                                    | 42 participants, ages 40+ years. Mean age = 57.93 in the autobiographical event condition (range = 41–69; SD = 8.21) and 57.90 in the public event condition (range = 40–69; SD = 8.15)                                             | For word-cued memories, a more pronounced bump was found between 5–19 years for AMs. For most important memories, a bump was found between 20–29 years in AM. Results suggested that the bump in most important AMs is a function of the cultural life script.                                                  |
| 38.        | Koppel, 2016<br>Denmark [89]             | Comparing the distribution of fictional memories with the distribution of actual word-cued, and most important, AMs in a sample of 61–70 year-olds                                          | Study 1: 42 participants, ages 61–70, mean age = 65.3, SD = 3.0<br>Study 2: 42 university students, ages 20–29, mean age = 23.3 years, SD = 2.2                                                                                     | A similarity was found between the temporal distributions of imagined memories and actual memories, suggesting the influence of constructive, schematic factors at retrieval on the bump.                                                                                                                       |
| 39.        | Krumhansl, 2013<br>USA [90]              | Investigating whether the pattern of music-evoked AMs and preferences may have changed given the rapid evolution of popular music styles, and music's prevalence, over the last few decades | 62 participants (40 women, 22 men), mean age = 20.1 (SD = 1.30)                                                                                                                                                                     | Showed the impact of music in childhood. An earlier peak occurred for 1960s music, which may be explained by its quality or its transmission through two generations.                                                                                                                                           |

(Continued)

Table 1. (Continued)

| Serial No. | First Author/ Year/ Country <sup>2</sup> | Objective                                                                                                                                                                                                                               | Sample size (n)                                                                                                                                                                                                                                                                                                                        | Findings                                                                                                                                                                                                                                                                                                     |
|------------|------------------------------------------|-----------------------------------------------------------------------------------------------------------------------------------------------------------------------------------------------------------------------------------------|----------------------------------------------------------------------------------------------------------------------------------------------------------------------------------------------------------------------------------------------------------------------------------------------------------------------------------------|--------------------------------------------------------------------------------------------------------------------------------------------------------------------------------------------------------------------------------------------------------------------------------------------------------------|
| 40.        | Leist, 2010<br>Germany [91]              | Examining distributions of remembered negative and positive life events across the lifespan in a sample of adults in middle and old age                                                                                                 | 260 participants ages 41–86, mean age = 57.06 (SD = 8.06)                                                                                                                                                                                                                                                                              | Distributions of positive, but not negative, life events showed a significant bump. There were substantial associations among number and valence of remembered life events, future time perspective, and functions of AM to create meaning, which remained significant after controlling for age and health. |
| 41.        | Platz, 2015<br>Germany [92]              | Replicating findings based on a German sample and investigating the influence of the affective characteristics of the songs on the frequency of participants' AMs                                                                       | Experiment 1: 48 participants ages 52–82. Mean age = 67.1 (SD = 6.8)<br>Experiment 2: 22 participants ages 60–74. Mean age = 66 (SD = 3.7)                                                                                                                                                                                             | Experiment 1 confirmed the bump from 15–24 years. Experiment 2 revealed that the affective ratings of songs were unequally distributed over the two-dimensional emotion space unlike the average rate of MEAMs which was nearly equally distributed.                                                         |
| 42.        | Rathbone, 2008<br>UK [93]                | Exploring the relationship between memory accessibility and self with a novel methodology that uses the generation of self-images in the form of "I am" statements                                                                      | Study 1: 16 participants ages 47–66 (11 women, 5 men). Mean age = 54.6<br>Study 2: 59 participants ages 39–76 (16 men, 43 women). Mean age = 53.95                                                                                                                                                                                     | Memories generated from "I am" cues clustered around the time of emergence for that particular self-image. Contrary to other memories, the first three selected memories showed a bump from 20–40 years.                                                                                                     |
| 43.        | Rathbone, 2017<br>UK [94]                | Investigating the role of the self in the reminiscence bump (heightened retrieval for events from young adulthood)                                                                                                                      | Study 1: 172 participants ages 40–80 (mean age = 49.97, SD = 8.92)<br>Study 2: 151 participants ages 40–65 (30 men). Mean age = 46.98 (SD = 5.73)                                                                                                                                                                                      | The distributions of personally significant songs formed bumps, contrary to personally significant films. It was found that personally significant songs were more likely to be associated with episodic recollection compared to personally non-significant songs.                                          |
| 44.        | Rubin, 1997<br>USA [15]                  | Analyzing the distribution of AMs across the adult life span                                                                                                                                                                            | Six groups of 20 participants according to age: 20, 20b, 35, 70, 73, and 73b                                                                                                                                                                                                                                                           | There was a decrease in memories from the childhood years and a power-function retention for the most recent 10 years. Older subjects had an increase in the number of memories from the ages of 10–30.                                                                                                      |
| 45.        | Rubin, 1997<br>USA [16]                  | Studying the distribution of AMs across the adult lifespan                                                                                                                                                                              | Experiment 1: 20 undergraduates ages 20 years, 1 month and 20 years, 11 months (mean age = 20.37); and 20 older adults ages 70 years, 1 month and 70 years, 11 months (mean age = 70.34)<br>Experiment 2: Five of the 70-year-olds, and 5 of the 20-year-olds from Experiment I                                                        | For word-cued AMs, older adults showed a bump from the ages 10–30. The five most important memories given by 20- and 35-year-olds were distributed similarly to their word-cued memories, but those given by 70-year-olds came mostly from the 20–30 year decade.                                            |
| 46.        | Rubin, 1998<br>USA [11]                  | Reviewing AMs and preference literature to document that events or activities that occur between the ages of 10–30 are recalled more often and judged to be more important, or better, than events or activities from other age periods | 60 participants tested in 1984: 30 university undergraduate students (mean age = 21.1, range 18–22 years), 30 older adults (mean age = 69.7, range 68–72 years)<br>60 participants tested in 1994: 30 university undergraduate students (mean age = 19.2, range 18–22 years), and 30 older adults (mean age = 69.8, range 66–72 years) | Factual, semantic, general-knowledge, and multiple-choice questions about the Academy Awards, the World Series, and current events from this period were answered more accurately by two different groups of 30 older adults tested 10 years apart.                                                          |

(Continued)

Table 1. (Continued)

| Serial No. | First Author/ Year/ Country <sup>2</sup> | Objective                                                                                                                                                                                                                  | Sample size (n)                                                                                                                                                                                                                                                                                                                                                                                 | Findings                                                                                                                                                                                                                                                                                                                                                                                |
|------------|------------------------------------------|----------------------------------------------------------------------------------------------------------------------------------------------------------------------------------------------------------------------------|-------------------------------------------------------------------------------------------------------------------------------------------------------------------------------------------------------------------------------------------------------------------------------------------------------------------------------------------------------------------------------------------------|-----------------------------------------------------------------------------------------------------------------------------------------------------------------------------------------------------------------------------------------------------------------------------------------------------------------------------------------------------------------------------------------|
| 47.        | Rubin, 2003<br>Denmark [33]              | Testing the life script explanation<br>Examining the life script for the classes of events that Berntsen and Rubin used<br>Examining classes of events that were used in Study 1                                           | Study 1: 1,307 participants above the age of 16 (20–99 years). Age groups: 20–29, n = 234 (mean age = 24.84); 30–39, n = 270 (mean age = 34.56); 40–49, n = 255 (mean age = 44.00); 50–59, n = 205 (mean age = 54.43); 60–69, n = 158 (mean age = 64.32); 70–99, n = 186 (mean age = 78.03)<br>Study 2: 87 undergraduate psychology majors ages 21–41 (68 women, 19 men; mean age = 26.2 years) | There was a bump for positive, but not negative, events, supporting the idea of culturally shared life scripts for positive, but not negative, events which structure retrieval processes and spaced practice.                                                                                                                                                                          |
| 48.        | Rybash, 1999<br>USA [95]                 | Shedding light on how episodic memory and semantic memory contribute to older adults' ability to retrieve autobiographical information across the different epochs of their lives                                          | 40 participants (mean age = 72.5; SD = 1.1)                                                                                                                                                                                                                                                                                                                                                     | Results showed a reminiscence bump from 6–15 years and a retention effect for both R (remembered) and K (knew) responses.                                                                                                                                                                                                                                                               |
| 49.        | Schrauf, 1998<br>USA [96]                | Assessing the effect of a major cultural and linguistic transition, such as immigration, on AM recall, as well as the personal memories of persons who make such transitions, preferentially sampled according to language | 12 participants from Spanish-speaking cultures who spent at least 30 years in an Anglo culture.<br>8 women, 4 men, ranging in age from 61–69 (mean age = 4.58; SD = 2.93).                                                                                                                                                                                                                      | An increase in memories followed the age of immigration and settlement. There were similar memory distributions for both the Spanish and English sessions. Events prior to migration were more frequently recalled in Spanish, whereas events after migration were more frequently recalled in English.                                                                                 |
| 50.        | Schrauf, 2001<br>USA [97]                | Assessing autobiographical recall corresponding to the time of immigration                                                                                                                                                 | 10 older participants who immigrated to the U.S. at ages 20–22, 24–28, and 34–35 (mean age = 64.5 years; SD = 2.5)                                                                                                                                                                                                                                                                              | Instead of the usual reminiscence bump, an increase in autobiographical recall corresponding specifically to age at immigration was found. This may be due to: the encoding of novel events, and the “effort after meaning” required to integrate these events; followed by a relatively stable period (settlement) marked by release from proactive interference and spaced rehearsal. |
| 51.        | Schubert, 2016<br>Australia [98]         | Investigating the utility of a non-SSP paradigm to determine whether the bump would emerge when participants were asked to recall a single memorable musical event from “a time long ago”                                  | 88 participants; 20–22 years old                                                                                                                                                                                                                                                                                                                                                                | Showed a bump as a result of participants spontaneously reporting the age at which they recalled a piece of music “from a time long ago,” with a significant bump occurring approximately 7 or 8 years earlier, at around 13 or 14 years old.                                                                                                                                           |
| 52.        | Schuman, 2014<br>USA [17]                | Comparing the memory when, for the first time, they are both obtained from the same large probability sample—in this case, from Americans aged 18 years and older                                                          | A large probability sample, N = 2,085                                                                                                                                                                                                                                                                                                                                                           | Findings revealed that there was peak in AMs and collective memories from 5–20 years and 5–30 years, respectively.                                                                                                                                                                                                                                                                      |
| 53.        | Steiner, 2014<br>USA [99]                | Examining the potential role played by mental representations of extended lifetime periods through a novel interview method                                                                                                | 34 participants ages 59–92 (mean age = 73.06; SD = 8.5)                                                                                                                                                                                                                                                                                                                                         | Older adults provided oral life stories; they divided their transcribed narratives into “chapters”. Participants' ages at chapter beginnings and endings showed pronounced bumps between 17–24 years.                                                                                                                                                                                   |
| 54.        | Svob, 2012<br>Canada [100]               | Investigating the intergenerational transmission of personal experiences and historically significant public events                                                                                                        | 60 undergraduates divided into two groups: the conflict group with 30 participants (14 men, 16 women; mean age = 18.8), and the non-conflict group with 30 participants (13 men, 17 women; mean age = 19.0)                                                                                                                                                                                     | Both groups produced sets of events that displayed a bump related to the parent's estimated age at the time of the event. The findings suggest that transitional impact and perceived importance help determine which events children will remember from a parent's life.                                                                                                               |

(Continued)

Table 1. (Continued)

| Serial No. | First Author/ Year/ Country <sup>2</sup> | Objective                                                                                                                                                                                                                                                                                                                                                                                          | Sample size (n)                                                                                                                                                                                                                                                                                                       | Findings                                                                                                                                                                                                                                                                                                                                               |
|------------|------------------------------------------|----------------------------------------------------------------------------------------------------------------------------------------------------------------------------------------------------------------------------------------------------------------------------------------------------------------------------------------------------------------------------------------------------|-----------------------------------------------------------------------------------------------------------------------------------------------------------------------------------------------------------------------------------------------------------------------------------------------------------------------|--------------------------------------------------------------------------------------------------------------------------------------------------------------------------------------------------------------------------------------------------------------------------------------------------------------------------------------------------------|
| 55.        | Tekcan, 2012<br>Turkey [101]             | Investigating age differences in life scripts by comparing adolescents, young adults, and older adults                                                                                                                                                                                                                                                                                             | 98 participants (43 women, 50 men, 5 unreported): 51 young participants (41 women, 10 men), and 42 older participants (26 women, 16 men)<br>Mean age: 14.04 for adolescents (SD = .20, age range 14–15), 20.61 for young adults (SD = 1.79, age range 18–29), and 78.45 for older adults (SD = 9.97, age range 54–96) | Results showed that adolescent and young adult scripts were more similar to each other than they were to older adult scripts. Older adult scripts were more typical, and showed a stronger bump for positive events corresponding to young adulthood. The bump for positive script events also emerged for events not experienced by the participants. |
| 56.        | Thomsen, 2008<br>Denmark [102]           | Examining: (a) if cultural life script events structure recall of life story memories, (b) if chapters show a bump during young adulthood, (c) if start and end memories of chapters correspond to cultural life script events, (d) if memories referring to both cultural life script events and chapter starts or ends contribute more strongly to the bump than memories with no such reference | 59 older participants: 27 women and 32 men with a mean age of 78.04 years (SD = 3.83; age range 71–88)                                                                                                                                                                                                                | Chapter and life story memories showed a bump in terms of an increased recall of life story memories and chapters between ages 6–30. The bump was significantly stronger for memories that referred to both prominent cultural life script events and chapter start or end points.                                                                     |
| 57.        | Thomsen, 2011<br>Denmark [103]           | Testing the hypotheses that: (a) ages marking the beginning of positive, but not negative, chapters produce a bump, (b) that specific memories are over-represented at the beginning of chapters                                                                                                                                                                                                   | 92 participants, ages 49–75 (mean age = 59.58; SD = 6.49), with 67 women and 25 men                                                                                                                                                                                                                                   | Only positive chapters formed a bump from 21–30 years, supporting the idea that chapters guide the search for specific memories, and that cultural life scripts contribute to the search process.                                                                                                                                                      |
| 58.        | Webster, 2007<br>Canada [104]            | Examining reminiscence functions and vivid (i.e., landmark) personal memories in nine samples ranging from the teens to the nineties                                                                                                                                                                                                                                                               | 198 participants ranging in age from 18–95 years                                                                                                                                                                                                                                                                      | Older adults tended to reminisce more for social functions, while younger adults did more for self-functions. Older adults reported vivid memories that were less intimate and less negative. Adults of all ages showed the bump between 20–29 years.                                                                                                  |
| 59.        | Wolf, 2016<br>Germany [105]              | Examining individual differences in the distribution of word-cued AMs                                                                                                                                                                                                                                                                                                                              | 118 older participants, mean age = 74.3 (SD 7.4 years), ranging from 60–99 years                                                                                                                                                                                                                                      | Results showed that AM distributions indicated a bump between 10–20 years. Results agree with the life-story account for the bump which integrates central components of previous accounts.                                                                                                                                                            |
| 60.        | Maki, 2006<br>Japan [106]                | Investigating if a reminiscence bump is found in AMs in Japanese elders, and the features and content of AMs in general, and in the bump                                                                                                                                                                                                                                                           | 25 participants more than 60 years old                                                                                                                                                                                                                                                                                | Results showed that although a reminiscence bump emerged between 7–25 years, memories within the bump did not differ from other memories in terms of rated features or content.                                                                                                                                                                        |
| 61.        | Berntsen, 2011<br>USA [107]              | Examining the effects of positive vs. negative emotion on the long-term accessibility of AMs<br>Comparing the CES answered for a highly negative vs. highly positive event in a large sample of older adults                                                                                                                                                                                       | 2,000 adults in their sixties                                                                                                                                                                                                                                                                                         | Overall, findings show that life script events expected to take place in young adulthood account for the greatest majority of all positive events, and explain the bump for positive events between 20–29 years—suggesting that many respondents used their cultural life scripts for guidance in nominating a “most positive” event.                  |
| 62.        | Raffard, 2010<br>France [108]            | Examining specificity, meaning-making, content, narratives for coherence, and self-event connections<br>Exploring the amount of experienced emotion during retrieval of SDMs                                                                                                                                                                                                                       | 81 patients with schizophrenia and 50 healthy controls                                                                                                                                                                                                                                                                | Results suggest that schizophrenia patients have difficulty organizing and extracting meaning from their past experiences to create coherent personal narratives. Patients exhibited an early bump (15–19 years).                                                                                                                                      |

(Continued)

Table 1. (Continued)

| Serial No. | First Author/ Year/ Country <sup>2</sup> | Objective                                                                                                                                                                                                        | Sample size (n)                                                      | Findings                                                                                                                                                                                                                                                                                                                                                      |
|------------|------------------------------------------|------------------------------------------------------------------------------------------------------------------------------------------------------------------------------------------------------------------|----------------------------------------------------------------------|---------------------------------------------------------------------------------------------------------------------------------------------------------------------------------------------------------------------------------------------------------------------------------------------------------------------------------------------------------------|
| 63.        | Schlagman, 2009<br>UK [109]              | Examining several memory characteristics (e.g., specificity, pleasantness, vividness) as a function of age and memory type<br>Comparing the distribution of voluntary/ involuntary memories across the life span | 44 younger, and 38 older, adults                                     | Results showed that older adults report fewer involuntary and voluntary memories than younger adults. The life span distribution of involuntary and voluntary memories did not differ in young adults or older adults, and there was a bump between 10–30 years.                                                                                              |
| 64.        | Schroots, 2004<br>Netherlands [110]      | Exploring the distribution of retrospective and prospective AM data across the lifespan, in particular, the bump                                                                                                 | 98 participants (47 men, 51 women)                                   | Study results confirm the universality of the bump for older adults, as well as the recency effect, and showed a bump from 10–40 years.                                                                                                                                                                                                                       |
| 65.        | Raffard, 2009<br>France [111]            | Investigating schizophrenic patients' ability to recall self-defining memories, that is, memories that play an important role in building and maintaining the self-concept                                       | 20 inpatients and outpatients with schizophrenia                     | Patients with schizophrenia exhibited an abnormal reminiscence bump (15–19 years), and reported different thematic content (i.e., they recalled less memories about past achievements and more memories regarding hospitalization and stigmatization of illness).                                                                                             |
| 66.        | Cuervo-lombard, 2007<br>France [112]     | Establishing that the defect of AM concern memories highly relevant to personal identity through the exploration of the reminiscence bump phenomenon in patients with schizophrenia                              | 27 patients diagnosed with schizophrenia and 27 control participants | Patients diagnosed with schizophrenia recalled less specific memories than control groups and exhibited an earlier reminiscence bump. They recalled more public, and less private, events than control groups, and they gave fewer Remember responses. The reminiscence bump peaked from 16–25 years for patients and from 21–25 years for the control group. |
| 67.        | Bernsten, 2002<br>Denmark [113]          | Examining the prevalence of involuntary memories across ages and the retention of positive and negative involuntary memories                                                                                     | 1,241 participants between 20 and 93 years old                       | Older respondents exhibited a clear bump in their twenties for only the most important and happiest memories. Happy, involuntary memories were over twice as common as unhappy ones, and were the only memories showed a bump for the decade of the twenties.                                                                                                 |
| 68.        | Maki, 2013<br>Japan [114]                | Examining whether the temporal distribution of AM changes when different types of cue words are used to elicit memories, and how the type of cue word affects the phenomenal characteristics of the memories     | 76 participants, ranging in age from 21–69 years                     | Phenomenological properties of AMs cued by emotional and emotion-provoking words were rated higher than those of memories cued by neutral words. The peak in the temporal distributions of the AMs cued by neutral cue words was between 9–12 years, and for emotion-provoking words, 17–21 years.                                                            |

Shows the data extracted and placed under appropriate sections corresponding to: author, year, country; study objective; sample size, and findings

1 Reminiscence bump, bump, or reminiscence effect, blip

2 Country = where the study was originally conducted. In case of missing information regarding country where study was conducted, corresponding author's country is mentioned.

<https://doi.org/10.1371/journal.pone.0208595.t001>

studies from 1988 to 1999, 29 studies from 2000 to 2010, and 26 studies from 2011 to 2017 (please see S2 Fig).

### Research study themes

The articles selected for review comprised 68 quantitative studies (N = 68; see Fig 2).

Four main themes emerged after reviewing these studies on the reminiscence bump: (a) methods of memory activation/instruction for life scripts, (b) types of memory /life scripts

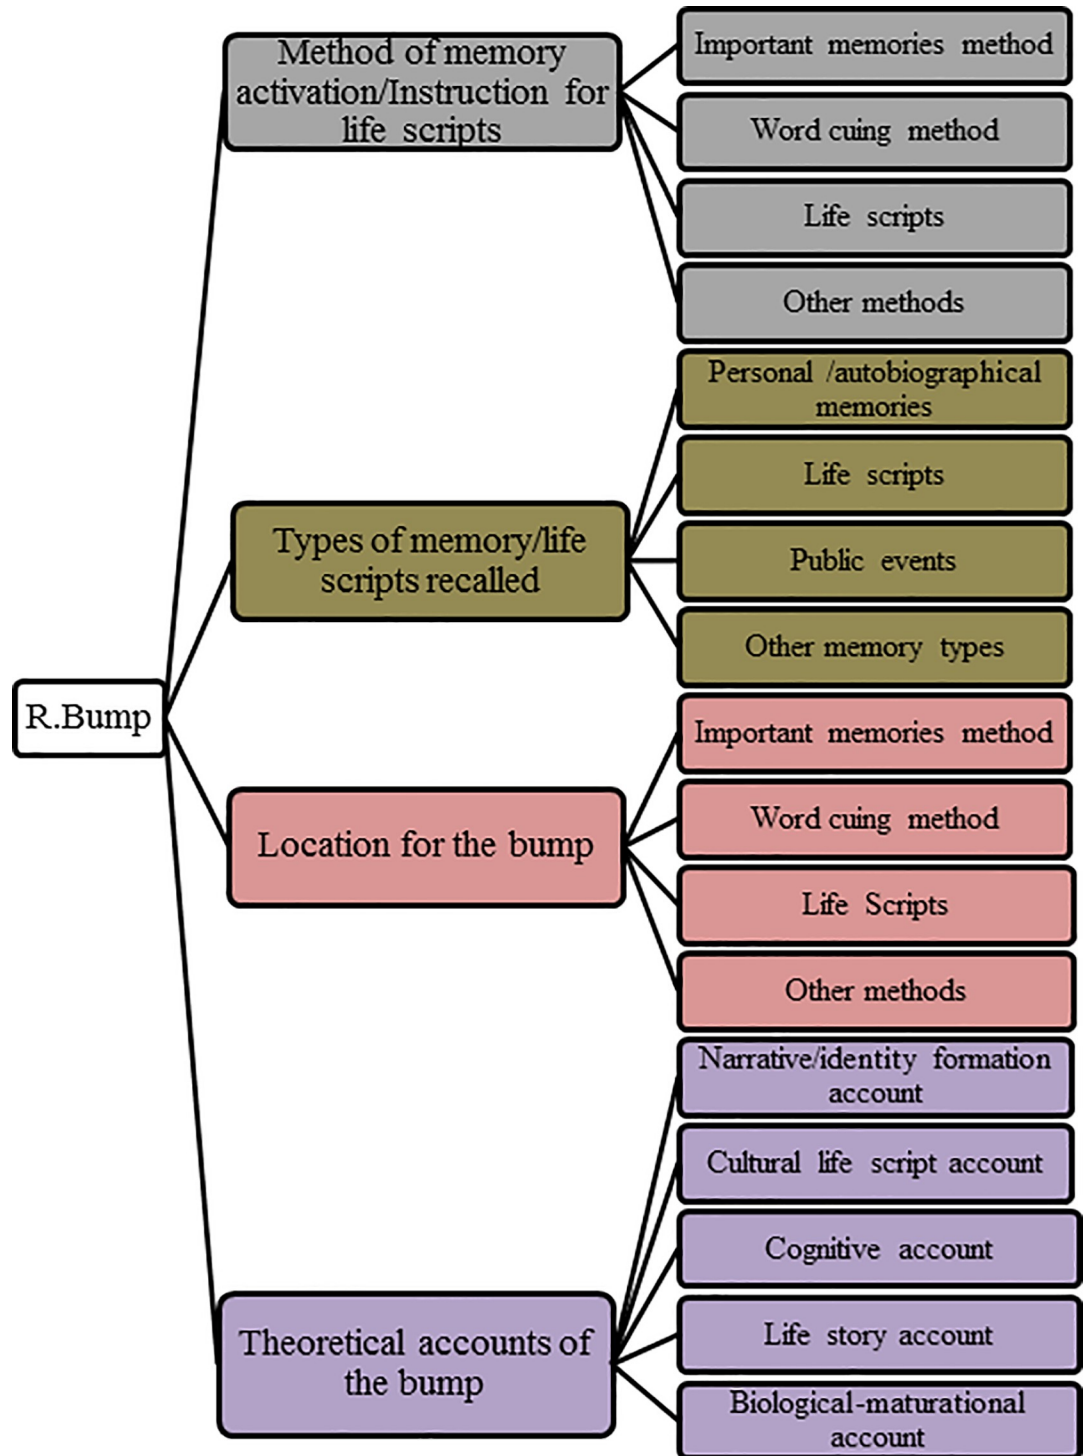

Fig 2. Summary of themes and sub-themes derived from these studies.

<https://doi.org/10.1371/journal.pone.0208595.g002>

recalled, (c) location of the reminiscence bump, and (c) theoretical accounts for the bump. These four themes evolved from 13 sub-themes.



**Method of memory activation/Instruction for life scripts.** The researchers used a variety of methods to recall memories or life events. Most studies implemented more than one recall method across a number of different populations.

**Important memories method.** Previous research consists of asking participants to report their important memories. Several studies ask participants about their most positive and negative, or most important and traumatic experiences, or important and surprising memories, used emotional cues (i.e. positive and negative), and asked participants to recall important positive and negative, or surprising positive and negative, events [22, 33, 35, 59, 72, 73, 100, 104, 107]. Furthermore, the past research studies focused on: (a) memories that are a vital component of life story, (b) life history timeline and significant life events narrative for the description of three events, (c) free narrative of life history about important life events and word cues, (d) descriptions of three self-defining memories, (e) Reminiscence Functions Scale and vivid memories that are important landmarks or turning points in life, (f) the Life Story Questionnaire for listing 15 personally important events or experiences, and (g) free narratives of life history; important life events [68–70, 108, 111, 113]. Two questionnaire-based studies instructed participants to report self-defining “I am” statements which were later used in recalling memories as well as a life event list for gathering distributions of positive and negative events [91, 93].

**Word cuing method.** A number of research studies use cuing methods for collecting memories, for instance odor cues, emotional cues and words cues. However, most of the studies used word cues for activating memories. The type of cues used, and their number, varies from study to study, and some studies use more than one cue recall method: (a) using word cues (i.e. emotional, emotion-provoking, and neutral); (b) instructing children to write future life stories using 10 word cues; (c) using both odor cues and word label cues; (d) reading novels and then implementing a cued recall task; (e) reporting important word-cue memories; (f) using 50 word cues for AMs; (g) employing 15 word cues pertaining to common locations, objects, positive emotions, negative emotions, and significant others; (h) Associative Memory Questionnaire with 18 word cues, (i) modified Autobiographical Memory Test having a list of 16 word cues; and (j) questionnaires implementing both the word cues and important memories method [17, 60–62, 64, 88, 89, 96, 114, 116].

Several studies assess life events through: (a) the use of various emotional cues to elicit and record events in the course of a typical and hypothetical person, and (b) verbal reporting of events from personal lives and diaries. Cued recall methods include: 10 word cues, 40 word cues for obtaining specific memories, and 20 ambiguous and 20 unambiguous single names [24, 75, 109]. A few studies use the Galton-Crovitz cueing method and Robinson word cuing technique [30, 76–78, 81, 82, 86, 105, 106]. The number of word cues used to elicit memories range from 15–124 [15, 16, 74].

**Life Scripts.** The studies on life scripts used various instructions to explore the reminiscence bump. For instance, these studies assessed the reminiscence bump through: (a) asking participants to report important events likely to occur in the life of a newborn or an elderly person; (b) the life script questionnaire; and (c) the expected timing of the public event [32, 71, 84, 87, 101].

**Other methods.** Other memory recall methods that were not associated with the three methods already discussed, were found in some studies (e.g., dream diaries, the evaluation of participants’ reactions to nostalgic advertising, a modified version of timeline methods for recording specific memories, issues surrounding the Academy Awards, World Series, and current events, life regrets’ content and chronology, and free recall events having public or private nature [9–11, 63, 65–67, 85, 110]). Adults were interviewed to discover their: recounted and oral life stories; specific autobiographical lifetime events; three favorite books, movies, and records,

or the five best football players; and memories using the Yearly News Memory Test (YNMT) comprising 30 open-ended and multiple-choice questions [79, 80, 83, 97, 99, 102, 103, 112]. A few studies used music clips and instructed participants to imagine music as a means to access associated memories [90, 92, 94, 98].

**Types of memory/life scripts recalled.** The 68 research studies elicited a variety of responses in types of memories activated.

**Personal /autobiographical memories.** One study elicited personal future life stories of children, and events from those stories [60]. In studies where participants reported autobiographical events for various types of cues, retrieved memories were from personal pasts [15, 16, 30, 33, 59, 61–63, 69, 74, 75, 76–78, 81, 86, 89, 90, 92, 93, 96, 98, 104–106, 109, 114]. The following were elicited in various studies: personal memories of adults spanning their life course, meaningful life events, life stories from across participants' life spans, lists of life events for AMs and collective memories, life-lines for both past and future events, and self-defining AMs [17, 22, 35, 66, 70, 72, 73, 91, 95, 97, 99, 102, 103, 107, 108, 110–113]. One study collected participants' personal specific memories and specific memories related to 70- and 80-year-old hypothetical cases [68].

**Life scripts.** These studies asked participants about important events likely to occur in the life of a newborn and important events a newborn or an elderly person would experience during his/her lifetime [32, 71]. A few research studies investigated original and modified versions of the life script questionnaire, and probed cultural expectations for the expected timing of the public event [84, 87, 101].

**Public events.** A number of research studies focused on memories for important public and private news items, as well as public events. [10, 80, 81]. In another study, authors elicited both autobiographical and public events [88].

**Other memory types.** Other research studies focused on curves of forgetting after memorizing a 10-chapter autobiographical novel, flashbulb memories, AM recall, and memories from the lives of participants' parents [24, 64]. Some studies investigated dreams of older adults' life regrets; flashbulb memories; reactions to nostalgic advertisements; and responses to the World Series, academy awards, and current events [9, 11, 65, 67, 85]. And in other studies, researchers asked participants to report three favorite books, movies, and records as well as the five best sports players of all time [79, 83, 94, 100].

**Location of the bump.** The temporal range of the bump varied along with the method of memory activation and presence or absence of a mental health issue (see Table 2).

**Important memories method.** Research studies using this method revealed the location of the bump to be from a minimum of 10 years to a maximum of 40 years of age, and some studies also showed a more localized peak from ages 16 to 20 years of age [33, 35, 59, 68, 93, 100, 104, 107, 113]. Findings of another study did not show the bump for AM distribution, however, a bump appeared for the life script distribution as a result of suppressing typical life events [69]. Three age intervals corresponded to the bump period (i.e. 16–20, 21–25, and 26–30 years) [69]. The responses to a newborn questionnaire demonstrated a considerably large bump for positive events in the third decade of life, a very small bump for negative events in the second decade of life, and a clear bump for positive events between 10 to 30 years of age [71]. The range of the bumps for positive, negative, expected, unexpected events, and significant life events narrative were between 16 to 30 years and 20–29 years of ages, respectively [22, 70, 72, 73, 91]. A few studies compared the bumps of control groups and patients with schizophrenia and found different results for both groups: 15–19 and 16–25 years for patients with schizophrenia; 20–24 and 21–25 years for control groups [108, 111].

**Word cuing method.** Using these methods, the distribution of the future life stories of Danish children illustrated a bump in young adulthood, and this bump consisted of life-script

**Table 2. Method of memory activation/life scripts and bump range.**

| Serial no.                       | First Author/Year     | Method of memory activation/Instruction for life scripts*                                                                                                                                                                                                                                                                                                                                                                                                                                                                                                                                                                                                                | Range of bump                                                                                                                                                                                |
|----------------------------------|-----------------------|--------------------------------------------------------------------------------------------------------------------------------------------------------------------------------------------------------------------------------------------------------------------------------------------------------------------------------------------------------------------------------------------------------------------------------------------------------------------------------------------------------------------------------------------------------------------------------------------------------------------------------------------------------------------------|----------------------------------------------------------------------------------------------------------------------------------------------------------------------------------------------|
| <b>Important memories method</b> |                       |                                                                                                                                                                                                                                                                                                                                                                                                                                                                                                                                                                                                                                                                          |                                                                                                                                                                                              |
| 1                                | Berntsen, 2011 [107]  | Participants recalled the most positive event of their lives and the traumatic or negative event that currently troubles them the most                                                                                                                                                                                                                                                                                                                                                                                                                                                                                                                                   | Most positive event of lives: 20–29                                                                                                                                                          |
| 2                                | Dickson, 2011 [68]    | In Study 2, participants recalled an especially positive event and an especially negative event, or a surprising positive event and a surprising negative event<br>In Study 4, participants recalled a highly expected event and a highly unexpected event. Participants also rated the emotional valence of both the highly expected and highly unexpected event they mentioned<br>Though the authors subsequently report the individual distributions for both the positive and negative expected and unexpected events, they also report the overall distributions, collapsed across positive and negative events; we report the bump in these overall distributions. | Especially Positive Event: 16–30<br>Surprising Positive Event: 16–30<br>Highly Expected Event: 16–30<br>Highly Unexpected Event: 16–30                                                       |
| 3                                | Ece, 2014 [69]        | Life script task: ten most important events in an expected life course of a person in their culture<br>Autobiographical memory task: report 10 important personally experienced life events                                                                                                                                                                                                                                                                                                                                                                                                                                                                              | Expected life events: 16–20, 21–25, and 26–30 years<br>Autobiographical memories: no reminiscence bump but clear childhood amnesia and recency effects                                       |
| 4                                | Fromholt, 2003 [73]   | Centenarians provided autobiographical memories to either a request for a life narrative or a request to produce AM to 15 word cues.<br>Experiment 1: 15-minute free narrative of life history following the instruction: “Tell about the events that have been important in your life”<br>Experiment 2: provide a specific, datable auto-biographical memory for 15 word cues (English translation: cat, cotton, fire, flag, flower, friend, money, morning, nail, picture, road, storm, sugar, ticket, and window).                                                                                                                                                    | 15–30                                                                                                                                                                                        |
| 5                                | Rubin, 2003 [33]      | Study 1: Memories for most afraid, most proud, most jealous, most in love, most angry, and most important event and whether this event was positive or negative<br>Study 2: Estimate 70-year-old men or women person’s age during each of a series of emotionally charged events                                                                                                                                                                                                                                                                                                                                                                                         | Study 1:<br>• Most positive important event: peaks in 20s<br>• Most angry: 13–19<br>• Most afraid: 20–29<br>Study 2:<br>• Most in love, Most important: 20–29<br>• Happiest, Proudest: 30–39 |
| 6                                | Svob, 2012 [100]      | Participants recalled and dated 10 important events from one of their parents’ lives                                                                                                                                                                                                                                                                                                                                                                                                                                                                                                                                                                                     | Reminiscence bump related to parents’ age at the time of the recalled events = 20–30<br>Mini-bump from the time the participant was born up to the present = 40–50                           |
| 7                                | Berntsen, 2002 [31]   | Participants were asked age of happiest, saddest, most traumatic, most important memory, and most recent involuntary memory                                                                                                                                                                                                                                                                                                                                                                                                                                                                                                                                              | Most important event: 20–29<br>Happiest event: 20–29                                                                                                                                         |
| 8                                | Leist, 2010 [91]      | Life Events lists: Participants marked each negative and positive life event on the lists, if the event occurred<br>Functions of autobiographical memory, Time and Future Perspective Questionnaire                                                                                                                                                                                                                                                                                                                                                                                                                                                                      | 20–29                                                                                                                                                                                        |
| 9                                | Rathbone, 2008 [93]   | All memories participants generated in association to “I am” statements:<br>• Study 1: 10 memories to each of three statements<br>• Study 2: 8 memories to each of four statements, as well as just the first three memories                                                                                                                                                                                                                                                                                                                                                                                                                                             | All Memories: No Bump<br>First Three Memories: 20–40                                                                                                                                         |
| 10                               | Fromholt, 1991 [72]   | 15-minute free narrative of life history focusing on important events<br>10-item meta-memory questionnaire                                                                                                                                                                                                                                                                                                                                                                                                                                                                                                                                                               | 10–30                                                                                                                                                                                        |
| 11                               | Elnick, 1999 [70]     | A life history timeline and a description of three significant life events narrative<br>The Family APGAR<br>Bloom’s Colorado Self-Report Measure of Family Functioning<br>Defense Styles Questionnaire<br>Modification of the Close Relationship Questionnaire<br>Self-Representations                                                                                                                                                                                                                                                                                                                                                                                   | Life history timeline: 20–29<br>Three significant life events narrative: 20–29                                                                                                               |
| 12                               | Fitzgerald, 1996 [35] | Participants recalled four events that they would include in a book about their life                                                                                                                                                                                                                                                                                                                                                                                                                                                                                                                                                                                     | 16–25                                                                                                                                                                                        |
| 13                               | Glück, 2007 [22]      | Participants completed the Life Story Questionnaire, in which individuals list up to 15 events or experiences that they consider most personally important in their life                                                                                                                                                                                                                                                                                                                                                                                                                                                                                                 | 16–30                                                                                                                                                                                        |

(Continued)

Table 2. (Continued)

| Serial no.                          | First Author/Year     | Method of memory activation/Instruction for life scripts*                                                                                                                                                                                                                                                                | Range of bump                                                                                                                                                                          |
|-------------------------------------|-----------------------|--------------------------------------------------------------------------------------------------------------------------------------------------------------------------------------------------------------------------------------------------------------------------------------------------------------------------|----------------------------------------------------------------------------------------------------------------------------------------------------------------------------------------|
| 14                                  | Alea, 2014 [59]       | 10 word cues: paper, pencil, child, hostage, seat, hospital, corpse, anxiety, candy, hammer<br>Life events questionnaire for 14 life events                                                                                                                                                                              | Positive Memories: 6–15; 26–30<br>Negative Memories: 6–15; 26–30                                                                                                                       |
| <b>Word and other cuing methods</b> |                       |                                                                                                                                                                                                                                                                                                                          |                                                                                                                                                                                        |
| 15                                  | Bohn, 2011 [60]       | Study 1: children wrote future life stories<br>Study 2: word cues to write down events from their future lives                                                                                                                                                                                                           | Study 1:<br>• Life scripted events: 20–30<br>• Non-life scripted events: 20–30<br>Study 2: Life scripted events: 20–30                                                                 |
| 16                                  | Chu, 2000 [61]        | 27 odor-related words                                                                                                                                                                                                                                                                                                    | 11–25                                                                                                                                                                                  |
| 17                                  | Conway, 1999 [62]     | Young and older groups of Bangladeshi participants recalled and dated autobiographical memories from across the lifespan in response to 15 word cues                                                                                                                                                                     | 10–30<br>Older adults 2 <sup>nd</sup> bump: 35–55                                                                                                                                      |
| 18                                  | Copeland, 2009 [64]   | Forgetting curves for information read in a 10-chapter novel where each chapter covered an approximately 10-year period in the life of the protagonist                                                                                                                                                                   | Novel summaries: 20s, 50s<br>Cued protagonist task:<br>• Chapter 3: 22 years<br>• Chapter 6: 50s                                                                                       |
| 19                                  | Koppel, 2016a [88]    | Word cuing method (10 word cues; i.e. money, water, child, clothing, church, woman, street, fire, kiss and city)<br>Important memories/important events method for three most important memories                                                                                                                         | Cue word method: 5–19<br>Important memories method: 20–29                                                                                                                              |
| 20                                  | Koppel, 2016b [89]    | Study 1: Seven word-cued and important autobiographical memories<br>Study 2: Seven word-cued and important autobiographical memories of a hypothetical 70-year-old                                                                                                                                                       | Study 1:<br>• Actual cue word method: 6–10<br>• Actual important memories method: 16–30<br>Study 2:<br>• Imagined cue word method: 6–25<br>• Imagined important memories method: 16–30 |
| 21                                  | Maki, 2013 [114]      | 22 word cues (emotional, emotion-provoking, and neutral)                                                                                                                                                                                                                                                                 | Neutral cue words: 9–12<br>Emotion-provoking words: 17–21<br>Emotional cue words: No peak (8–30)                                                                                       |
| 22                                  | Rybash, 1999 [95]     | 18 Total words, with an unspecified combination of nouns, activity verbs, and affect terms<br>Authors collected remember/know ratings for each memory, and plotted the distributions separately for memories that received either remember, or know judgements                                                           | 6–15                                                                                                                                                                                   |
| 23                                  | Schrauf, 1998 [96]    | Autobiographical memories to 50 word cues                                                                                                                                                                                                                                                                                | 10–30, 20–24, 34–35                                                                                                                                                                    |
| 24                                  | Schuman, 2014 [17]    | A specific event from own life in response to eight word cues (e.g. flower, horse, fire, bird, lake, window, book, and friend)<br>Collective memories for national and world events rated important                                                                                                                      | Autobiographical memories: 5–20<br>Collective memories: 5–30                                                                                                                           |
| 25                                  | Fitzgerald, 1988 [24] | Study 1: 40 word cues autobiographical memory task<br>Study 2: three flashbulb vivid memory descriptions                                                                                                                                                                                                                 | 16–20                                                                                                                                                                                  |
| 26                                  | Haque, 2010 [75]      | Participants recalled the happiest event, saddest event, most important event, most traumatic event, most angry event, most in love event, most jealous event, most proud event, most fearful event, the event indicating the highest success, and the most surprising event of their lives                              | Happiest Event: 20–29<br>Most Important Event: 20–29<br>Most in Love Event: 20–29                                                                                                      |
| 27                                  | Jansari, 1996 [76]    | Experiment 1: participants recalled events freely or under instructions to avoid recent memories. (16 Nouns, 16 Activity Verbs, and 16 Affect Words)<br>Experiment 2: recall was constrained to particular life periods. (Participants recalled memory to sixteen word cues (6 nouns, 5 verbs, and 5 affect words) from) | 6–15                                                                                                                                                                                   |
| 28                                  | Janssen, 2003 [77]    | 64 word cues                                                                                                                                                                                                                                                                                                             | 10–30                                                                                                                                                                                  |
| 29                                  | Janssen, 2005 [78]    | 10 word cues: recall and date autobiographical memories                                                                                                                                                                                                                                                                  | 15–25<br>Peaks: Men, 15–18; Women, 13–14                                                                                                                                               |
| 30                                  | Janssen, 2008 [30]    | 10 word cues: describe the personal events that came to mind                                                                                                                                                                                                                                                             | 6–19 (Overall)<br>Young adults: 8–12<br>Middle-aged adults: 6–16<br>Older adults: 7–20                                                                                                 |

(Continued)

Table 2. (Continued)

| Serial no.           | First Author/Year     | Method of memory activation/Instruction for life scripts*                                                                                                                                                                                                                                                     | Range of bump                                                                                            |
|----------------------|-----------------------|---------------------------------------------------------------------------------------------------------------------------------------------------------------------------------------------------------------------------------------------------------------------------------------------------------------|----------------------------------------------------------------------------------------------------------|
| 31                   | Janssen, 2011 [81]    | Galton–Crovitz test: 64 word cues                                                                                                                                                                                                                                                                             | 4–21                                                                                                     |
| 32                   | Janssen, 2011 [82]    | 10 noun word cues                                                                                                                                                                                                                                                                                             | 6–20                                                                                                     |
| 33                   | Kawasaki, 2011 [86]   | Each participant received a random selection of 10 word cues out of 64 word cues                                                                                                                                                                                                                              | Young adults: 5–13<br>Middle-aged adults: 6–15                                                           |
| 34                   | Rubin, 1997 [15]      | 124 word cues<br>5 most important memories                                                                                                                                                                                                                                                                    | 10–29                                                                                                    |
| 35                   | Rubin, 1997 [16]      | 124 word cues for autobiographical memories                                                                                                                                                                                                                                                                   | 10–30                                                                                                    |
| 36                   | Wolf, 2016 [105]      | 39 word cues: nouns, verbs, and adjectives                                                                                                                                                                                                                                                                    | 10–20                                                                                                    |
| 37                   | Maki, 2006 [106]      | 9 nouns, 7 emotional words, and 6 emotion-provoking words                                                                                                                                                                                                                                                     | 7–25                                                                                                     |
| 38                   | Schlagman, 2009 [109] | Diary<br>Word cues (e.g. cabin, pipe, elephant, chest, silk, theatre, watch, whip, pillow, and giant)                                                                                                                                                                                                         | 10–30                                                                                                    |
| 39                   | Gidron, 2007 [74]     | Modified Autobiographical Memory Assessment: autobiographical memories to 4 groups of 16 word cues reflecting events from childhood, adolescence, adulthood and late age                                                                                                                                      | 10–25                                                                                                    |
| 40                   | Raffard, 2010 [108]   | Self-defining memories questionnaire: Participants recalled three self-defining memories                                                                                                                                                                                                                      | Control: 20–24<br>Schizophrenia: 15–19                                                                   |
| 41                   | Raffard, 2009 [111]   | Self-defining memories questionnaire: Participants recalled three self-defining memories                                                                                                                                                                                                                      | Schizophrenia: 15–19<br>Control: 20–24                                                                   |
| 42                   | Webster, 2007 [104]   | Described a vivid memory that “was important in your life, or that changed how you think about yourself”                                                                                                                                                                                                      | 20–29                                                                                                    |
| <b>Life Scripts</b>  |                       |                                                                                                                                                                                                                                                                                                               |                                                                                                          |
| 43                   | Berntsen, 2004 [32]   | Reanalysis of earlier studies on age norms<br>How old hypothetical centenarians were when they were most happy, most sad, most afraid, most in love, and had their most important and most traumatic experiences<br>Seven important events likely to occur in the life of a newborn                           | Positive events: 15–30                                                                                   |
| 44                   | Erdoğan, 2008 [71]    | List the seven most important events a newborn or an elderly person would experience during his/her lifetime and estimate the prevalence, importance, age-at-event and emotional valence of each                                                                                                              | Study 1:<br>• Positive events: 20–30<br>• Negative events: 10–20<br>Study 2: Positive events: 20–30      |
| 45                   | Janssen, 2015 [84]    | Life script questionnaire (i.e., personal events; seven most important events expected to happen in a prototypical infant’s life)<br>Modified version of the life script questionnaire (i.e., public events)                                                                                                  | 16–30                                                                                                    |
| 46                   | Koppel, 2014 [87]     | Study 1: probing cultural expectations for the expected timing of the public event that a typical person considers to be the most important of their lifetime<br>Study 2: probing cultural expectations for the expected timing of the objectively most important public event of a typical person’s lifetime | Study 1: 11–30<br>Study 2: 11–30<br>Peak: 16–20, 21–25                                                   |
| 47                   | Tekcan, 2012 [101]    | Adolescents, young adults, and older adults listed the seven most important events that a typical newborn would experience in a lifetime                                                                                                                                                                      | Positive events: 30–39<br>Negative events for adolescents, young adults: 13–19                           |
| <b>Other methods</b> |                       |                                                                                                                                                                                                                                                                                                               |                                                                                                          |
| 48                   | Cappeliez, 2008 [9]   | Write in home dream diary for a week                                                                                                                                                                                                                                                                          | 15–25                                                                                                    |
| 49                   | Conway, 2005 [63]     | Participants were required to recall 20 specific AMs from their own lives                                                                                                                                                                                                                                     | 10–30                                                                                                    |
| 50                   | Davison, 2008 [65]    | A questionnaire in which 40-year-olds and senior adults described and dated up to five regrets for specific or general experiences                                                                                                                                                                            | Study 1: 10–19<br>Study 2, Participants in Their 40s: 20–29<br>Study 2, Participants in Their 60s: 20–29 |
| 51                   | Demiray, 2009 [66]    | Participants free-recalled autobiographical memories, and were given 7 min to retrieve as many memories as they could for each five-year interval in their life (e.g. from 20–25)                                                                                                                             | 10–30                                                                                                    |
| 52                   | Denver, 2010 [67]     | Free recall flashbulb memories from personal lives, 9/11, and a personal flashbulb memory. Adapted version of the Memory Characteristics Questionnaire                                                                                                                                                        | Study 1: 10–30<br>Study 2: 10–30                                                                         |
| 53                   | Holmes, 1999 [10]     | Participants free-recalled when they had learned public and private items of news                                                                                                                                                                                                                             | Public Items: 10–19<br>Private items of news: 20–29                                                      |

(Continued)

Table 2. (Continued)

| Serial no. | First Author/Year          | Method of memory activation/Instruction for life scripts*                                                                                                                                                                                            | Range of bump                                                                                                                              |
|------------|----------------------------|------------------------------------------------------------------------------------------------------------------------------------------------------------------------------------------------------------------------------------------------------|--------------------------------------------------------------------------------------------------------------------------------------------|
| 54         | Rubin, 1998 [11]           | Factual, semantic, general-knowledge, multiple-choice questions about the Academy Awards, the World Series, and current events                                                                                                                       | 10–30                                                                                                                                      |
| 55         | Schroots, 2004 [110]       | Life-line Interview Method: Participants were asked to draw a life-line for both past and future events, and to date and label each event                                                                                                            | 10–40                                                                                                                                      |
| 56         | Cuervo-lombard, 2007 [112] | Participants recalled 20 specific autobiographical events during their lifetime                                                                                                                                                                      | Patients: 16–25<br>Controls: 21–25                                                                                                         |
| 57         | Schrauf, 2001 [97]         | Hispanic adults who immigrated to the USA at ages 20–22, 24–28, and 34–35 narrated their life-stories on twice, once in English and once in Spanish                                                                                                  | Early immigrants (ages 20, 21, 22) = 20–29<br>Middle immigrants (ages 24, 26, 28, 30) = 30–39<br>Late immigrants (ages 34, 35, 35) = 40–49 |
| 58         | Steiner, 2014 [99]         | Novel interview: older adults provided oral life stories, and they divided their transcribed narratives into chapters                                                                                                                                | 17–24                                                                                                                                      |
| 59         | Thomsen, 2008 [102]        | Participants recalled the five events that they considered most central to their life story                                                                                                                                                          | 6–30                                                                                                                                       |
| 60         | Thomsen, 2011 [103]        | After dividing their life story into chapters, participants recalled an important specific memory from their most positive and most negative chapter, respectively                                                                                   | Memory from the most positive chapter: 21–30                                                                                               |
| 61         | Krumhansl, 2013 [90]       | Young adults' personal memories associated with top music hits over 5-and-a-half decades                                                                                                                                                             | Unclear                                                                                                                                    |
| 62         | Platz, 2015 [92]           | Experiment 1: Participants listened to excerpts from 80 number-one, popular music hits from 1930 to 2010 and gave written self-reports on music-evoked autobiographical memories<br>Experiment 2: Other participants rated affective characteristics | 15–24                                                                                                                                      |
| 63         | Rathbone, 2017 [94]        | Memories related to top-grossing films and songs, selecting the five that were most personally significant                                                                                                                                           | Study 1: Personally significant films and songs, Songs: 15–19<br>Study 2: Songs, 10–14<br>Films: No Bump                                   |
| 64         | Schubert, 2016 [98]        | Participants were asked to recall a single memorable musical event from “a time long ago”                                                                                                                                                            | 13–14                                                                                                                                      |
| 65         | Janssen, 2007 [79]         | Participants were asked to name their three favorite books, movies, and records and time period they first encountered them                                                                                                                          | 16–20                                                                                                                                      |
| 66         | Janssen, 2008 [80]         | Yearly News Memory Test (YNMT)                                                                                                                                                                                                                       | 10–25                                                                                                                                      |
| 67         | Janssen, 2012 [83]         | Participants were asked who they thought the five best players of all time were                                                                                                                                                                      | 11–30                                                                                                                                      |
| 68         | Ju, 2016 [85]              | Reactions to nostalgic advertising                                                                                                                                                                                                                   | 15–24                                                                                                                                      |

\* For the ease of categorization, we have classified studies using more than one method of memory activation/instruction for life scripts under one method based upon the dominant method employed. The “Range of bump” column, however, illustrates ranges for all the methods utilized within each study despite the study’s location under the heading for the dominant method employed.

The range and location of the bump vary with respect to the method for activating different types of memories.

<https://doi.org/10.1371/journal.pone.0208595.t002>

events [60]. Studies discovered bumps from a minimum of 6 years of age to a maximum of 35 years of age [11, 15, 16, 24, 30, 61, 62, 74–76, 78, 81, 82, 88, 89, 95, 106, 109, 114]. One study, using a novel cuing method, revealed two bumps: The first bump appeared when the protagonist of the story was 22 years old, and the second occurred when she was in her 50s and undergoing significant life changes [64]. Studies revealed the timing of the bump to be between the ages of 10 to 30, with peaks occurring between 15–18 for men, 13–14 for women, 5–13 for Japanese adults, and from 5–30 for personal and collective memories; a peak in recall occurred between 10–19 years of age for public items and 20–29 years of age for private items, and a bump between 10 to 30 years of age [17, 77, 78, 86, 105].

**Life scripts.** The studies on life scripts revealed varying locations of the bump. These studies revealed the bumps of positive and negative events from a minimum of 6 to a maximum of 39 years of age [32, 71, 84, 87, 101].

**Other methods.** A study using a heterogeneous sample from five countries (i.e. Japan, Bangladesh, U.K., China and the U.S.) revealed that more than 50% of memories were recalled from the ages of 10–30 [63]. Studies also showed a bump in late adolescence to early adulthood as well as a bump between 15 to 24 years of age [9, 11, 65, 67, 79, 85, 92, 94, 99]. Two studies, using a life history timeline method and a “life-line” interview method, discovered the bump between 10–30 and 10–40 years of age, respectively [66, 110]. A study using cues explored memories of younger and older Bangladeshi individuals: Younger adults showed a bump between 10–30 years of age, whereas an older group revealed a second bump between 35–55 years of age [62]. The bump corresponding to ages of immigrants at the time of immigration, occurred between 6–30 and 10–25 years of age [80, 97, 98, 102, 103]. A study using free recall flashbulb memories from personal lives reported a bump between 10 to 30 years of age [67]. A study conducted on patients with schizophrenia revealed bump between 16–25 years for patients and 21–25 for controls [112].

**Theoretical accounts for the bump.** There are a variety of theoretical accounts for the bump, and each account has received varied levels of support in the research. The narrative/identity account is fully supported by the findings of seven studies [9, 10, 35, 36, 62, 70, 93], and partially supported by the findings of six studies [24, 72, 76, 108, 111, 112]. Two studies illustrated complete support for the cultural life script account [33, 71], while ten studies showed partial support [32, 60, 75, 87, 89, 100–103, 114], and two studies demonstrated no support at all [59, 84].

Four studies supported the “life story” account [22, 66, 73, 105], three studies supported differential encoding and differential sampling [78, 79, 92], one study supported the “life-span perspective” [110], one study supported the cognitive account [97], and two studies showed some support for the “biological-maturational” account [30, 74]. Several research studies supported more than one theoretical account for the bump: the cultural life script and “novelty” accounts [64]; the narrative/identity and cultural life script accounts [65, 68, 107]; the narrative/identity, cognitive and “maturational” accounts [67, 96, 109]; the cognitive, narrative/identity, cultural life script, and life story accounts [69, 94]; the cognitive, narrative/identity, and cultural life script accounts [80]; the biological, narrative/identity, and cultural life script accounts [83]; and the cognitive and narrative/identity accounts [11].

## Discussion

Despite the wealth of evidence existing on aspects of the reminiscence bump that present when using different methods for activating memories, there is a limited understanding of which theoretical account—or accounts—offers the best explanation for the bump, and the reasons for variation in the exact location of the bump. The aim of this systematic review is to establish a current evidence base concerning the understanding and formation of the bump, and to add to the existing body of literature on AMs, other kinds of memories and the reminiscence bump.

## Summary of study findings

The results of this systematic review on the reminiscence bump are based on the analysis of 68 selected studies retrieved from 9 scientific databases and screened by the researchers. The results reveal that methods for activating memories/instruction for life scripts include the important memories method [33, 69, 100], word cuing method [17, 60, 61, 64, 68, 114], life scripts [32, 71, 84, 87, 101], and other heterogeneous methods [72, 73, 79, 80, 83, 97, 99, 102, 103]. A variety of responses were elicited from the participants including: AMs [15, 16, 30, 33,

59, 61–63, 74, 76–78, 81, 86, 90, 92, 93, 96, 98, 104–106, 114], memories for public events [10, 80, 81], life scripts [32, 71, 84, 87, 101], and other heterogeneous responses [79, 83, 94, 100].

The exact location of the bump varied with each method for activating memories. For instance, with the important memories method, studies showed the bump between 10–30 years of age [11, 22, 32, 33, 35, 65, 67, 69, 71, 84, 87, 93, 95, 100]. For word cuing method, the bump began as early as 5 years, and lasted until as late as 30 years of age [10, 17, 77, 78, 86, 114]. Likewise, for the studies using life scripts, the location of the bump was from 6 to 39 years. Also, there are a variety of theoretical accounts offering an explanation for the bump for different kinds of memories activated, such as the narrative/identity account which received significant support from eight studies [9, 10, 24, 35, 63, 70, 93, 94], the life story account garnering sound support in four studies [22, 66, 73, 105], and the cultural life script account finding substantial support in two studies [33, 71]. The narrative/identity account received partial support from seven studies [10, 24, 72, 76, 108, 111, 112], and the cultural life script account received a degree of support from ten studies [32, 60, 75, 87, 89, 100–103, 114].

### Interpretation of study findings

Past research indicates that the cues used to induce the memories influence both the proportion of memories recalled and the location of the bump [8, 15]. A variety of cuing methods exist, therefore different retrieval processes help to explain the differences in reported location of the bump and the distribution of AMs [117]. The research demonstrates that word cues initiate an associative, “bottom-up” process in memory, whereas the important memories method prompts a strategic, “top-down” process in memory that is organized around important memories [8, 12]. The Attention-to-Memory hypothesis [118, 119], proposes that the two major brain regions playing different roles in attention are the dorsal parietal cortex and the ventral parietal cortex. The dorsal parietal cortex is associated with top-down attention (i.e. selecting stimuli on the basis of the internal goals of the individual); the ventral parietal cortex is concerned with bottom-up attention (i.e. permitting the detection of related stimuli) [120, 121].

The Attention-to-Memory hypothesis states that in addition to playing a significant role in attention, the two cortexes play similar roles in memory retrieval [122]. The dorsal parietal cortex initiates the assignment of attentional resources towards retrieval of a specific memory (i.e. top-down Attention-to-Memory) [122]. The important memories method supports this, as the dorsal parietal cortex initiates top-down attention when retrieval relies on memory search [8, 12]. Alternatively, in word cuing methods, the ventral parietal cortex initiates a bottom-up attention focus on the basis of retrieved content. Recent reviews on recognition memory studies support these theories and the localization of the top-down and bottom-up attention [123]. The instructions for the important memories method initiate a search for relevant memories—a role of the dorsal parietal cortex. The instructions for memories related to word cues initiate rapid detection of memory content—a role of the ventral parietal cortex.

Memory activation methods play a significant role in the nature of the memories activated. Word cuing methods yield unbiased sampling of memories across the entire life span [12], whereas the important memories method focuses on eliciting the most important memories of a person’s life, and tends to produce a narrative-based search [8, 12]. Important and self-defining memories are closely linked to the meaning-making processes of individuals [124, 125]. The different types of memory activation methods and theoretical accounts of the bump have common underlying mechanisms influencing bump location. The range and location of the bump vary according to memory activation method: word cuing methods yield a disproportionately large number of recent memories and an earlier bump location (see Table 2), as well



as with respect to the type of memories activated. Differing locations of the bump have significant implications for theoretical accounts explaining the bump [8]. In this review, the researchers present a general range of the bump approximated through the analysis of all studies: 16–30 years of age for the important memories method; 5–30 years of age for word cuing methods. A past review paper calculated the mean range and midpoint of the bump formed through different cuing methods. The mean range of bump for word cued and important memories was calculated between 8.7 to 22.5 and 15.1 to 27.9 years of age, respectively [8]. The differences in location of the bump could be due to different methods of activating memories or differences in memory types.

Disparate bump ranges are indicative of the processes occurring at retrieval, favoring a retrieval-based account of the bump. This contradicts the accounts focusing on characteristics of the memories themselves (i.e. narrative/identity account and cognitive account) [11, 24, 25, 35, 40], or the effectiveness of encoding during the bump period (i.e. cognitive abilities account) [11, 126]. These findings suggest a schema-based explanation of the bump (i.e. cultural life script account) rather than an individualistic and memory-based account [32]. There is considerable supporting evidence for the role of cultural life scripts in organizing the retrieval of AMs for important and emotional events [32, 33, 68, 125, 127]. According to Rubin (2015), variations in bump peaks cannot be explained solely in terms of encoding, or by theoretical accounts, especially those that consider adolescence and early adulthood periods to be when the emergence of identity or heightened cognitive ability occurs [3, 11, 117]. Different methods of activating memories give rise to different bumps and the mechanism underlying the bumps for different types of memories are different. The mechanism is different when other kinds of responses or memories are elicited (e.g., life scripts, dreams, etc.)

Life scripts allow encoding and rehearsal of an event by attributing the personal events to some culturally shared importance. A majority of the life script events are anticipated, prepared for, and given a certain meaning before they even happen in a person's life [32]. According to established empirical evidence, the recall of important life events is structured by the life scripts, however, there is no such structuring of life events through cues, as cues are not likely to initiate culturally shared schemata for important transitional events [46]. The cultural life script account is possibly the reason behind the prevalence of important memories in the bump and a greater proportion of life script events in important memories.

This review demonstrates that the cultural life script account received considerable support, yet accepting it as a possible explanation for the bump would be problematic owing to some inherent flaws. The cultural life script account utilizes the concept of life scripts—cultural expectations about the timing and arrangement of significant transitional life events in a prototypical life course—to provide a cultural explanation for the bump [31–33]. The empirical evidence partially supporting the cultural life script account also employed other theoretical accounts to explain these findings [32, 60, 75, 87, 89, 100–103, 114]. Very few studies have compared the life script and real life events [68, 75]. Thus, there is a lack of evidence for comparison of the bump patterns for life script events and real life events, and the similarity between the cultural life script events and non-scripted events [33, 60, 68, 128]. The similar bump patterns for both life script events and real life stories, run contrary to the premise of the cultural life script account, meaning that the cultural life script is not solely responsible for the recall of the events and formation of the bump [32].

The fact that the bump is not based on the age of the memories, but on the age of the person recalling at the time of encoding, implies that findings of an artifactual, retrieval based account of the bump (i.e. the cultural life script account) can be rejected [3]. Memories may be easily retrieved due to the originality of the experiences (i.e. high emotional valence), or because they play a role in higher-order structures of the personality (i.e. significance or self-relevance). A

bump for vivid memories may occur due to salience rather than mere nostalgia, but are significant because they define who a person is [24]. The ability of a person to consciously recall memories, to identify them as linked to his/her personal past, and to relate them to his/her goals and desires permits the formation of a coherent personal narrative concerned with the present and the future [111, 129].

Researchers propose that there is an emergence of adult identity during late adolescence and early adulthood [130]. This period may contain many self-defining incidents which link the self of an individual to that particular reality [131]. Therefore, an account focusing on the role of self in the bump (e.g. narrative/identity account) can be used to explain the occurrence of memories from this period [62]. The bump reveals an era in an individual's life that is crucial for the development and maintenance of a stable self, as basic cognitive changes across the life span cannot be solely responsible for shaping retrieval [11, 130]. It is likely that the development of a new self initiates preferential encoding due to the importance of the formation of particular personal and cultural identities [22, 31, 132]. As AMs ground the self, there is a possibility that the importance of identity development stimulates the use of cognitive mechanisms [11, 36].

The narrative/identity account received significant support: a study analyzing dream content, temporally linked with the bump, revealed themes associated with identity and life goals [9]. However, the dreams were collected from professional career women mostly at retirement age, who were already experiencing a transition—during which most people are concerned with life orientation and purpose—that could trigger the importance of identity. Another study collected benchmarked memories from the life history timeline, revealing a bump associated with identity formation in early adulthood, however, the bump was seen concerning only family or relationships [70]. A high correlation between levels of rehearsal and preoccupation with stories from participants' lives could show potential support for the narrative/identity account, but causal claims cannot yet be made [35].

Free recall of public and private news items revealed differential bumps: 10 to 19 years for public items and 20 to 29 years for private items [42]. The earlier bump reflects a period of formation of generation identity, while the later bump mirrors a period of formation of intimate relationships [42]. The generation of self-images in the form of "I am" statements to test the relationship between memory accessibility and self, lends support to the narrative/identity account due to the clustering of AMs around the time of self-formation [93]. However, this evidence was only found when the first three memories representing each self were compared at age 20 versus age 40. Another study revealed an absence of the bump for AMs when highly self-relevant life events were suppressed [69].

Similar support is shown in studies by examining the relationship of highly positive and highly negative events with life story and identity [107]; and the role of generational identity with the development of an integrative self behind the bump [62]. The latter study demonstrates an accessibility of AMs from a period outside of the reminiscence bump that are suggested to be relevant to the self [111]. In this study, a group of older Bangladeshi participants presented a second bump for the ages of 35 to 55 years, coinciding with the period of Bangladesh's war for independence in 1971. It is suggested that the second bump is due to the enhanced retrieval of AMs from a period when Bengalis, as a nation, were struggling to establish their own independent country, and to uphold their collective Bengali identity. However, a current debate exists on whether individuals recall public events from the bump period because of their identification with those events, or because of better encoding of them [80]. The narrative/identity account states that all the memories for adolescent events are not necessarily self-narrative memories, but rather that more events from this phase, with a better availability for recall, form a pool for self-narrative memories.

Alternatively, the ratings of re-living and vividness showed no differences between bump and non-bump memories, thus rejecting the role of phenomenological features of memories in the bump formation [82]. One study investigating the personal significance of songs showed a bump for both R (remember) and K (know) ratings [94]. Although a greater number of personally significant songs were associated with R ratings, K ratings also formed a bump, even though according to the narrative/identity account, they should not do so. The question of circularity raised in the research has not been answered (i.e. whether the selection of songs as personally significant is due to their association with particular memories, or high personal importance of a song leads a person to relate this song to specific memories from the time it was heard) [94].

The preponderance of memories from the bump period does not mean that these memories are related to identity formation unless there is a direct retrieval of identity related memories and an analysis of the lifespan distribution of these memories is performed. Although the narrative/identity account states that the bump is the result of an identity-relevant process, substantial evidence is still needed. Furthermore, the way identity-related questions are formulated, and the functional demands of answering these questions for the participants, impacts the construction of available memories. Various factors such as emotional salience, specific temporal and geographical context, sociocultural factors and a self-reference effect might influence the preferential retrieval of personally significant, over non-significant, events [133, 134]. As a result of the interplay between these factors, information associated with the self tends to be remembered best [135]; and thus, these more easily remembered memories may not necessarily indicate that bump memories are from important identity-forming events.

The heterogeneous methodologies of the studies in this review have created difficulty for the authors in discerning a link between identity formation and the bump, as the studies are based on memories, or important memories, and ratings. A major issue with ratings lies in the fact that these ratings reflect how study participants currently feel about their experiences rather than what they felt at the time of encoding the memories. Therefore, ratings have a limited role in identity related explanations of the bump (e.g. it is difficult to ascertain how study participants recalled and reported their judgments of rehearsal to reflect true/precise rehearsal rates).

The authors did not find any direct request to recall specific self-defining memories (SDMs) in the research, while important life event narratives were requested. Two studies investigated the role of the self in AMs by examining SDMs [136]. The exploration of SDMs is an important approach for understanding the association between identity and the bump as they are memories of events that one draws on to inform one's sense of identity [137, 138]. A few studies did investigate the self-relevance of autobiographical events in the bump and their centrality to the life story and identity, SDMs, and self-images [93, 107, 108, 111]. The identity of individuals depends upon their ability to recall personal history, in the form of self-defining memories [139]. Therefore, there is a need to look deeper into the encoding and retrieval of event-specific temporal knowledge for understanding the self and identity [140].

The key to understanding the bump may lie in the memories of self-defining events during adolescence and early adulthood, as the narrative/identity account claims that many memories found in the bump are from this period [24, 93, 131, 141]. These memories play a vital role in the regulation of mood and direct functions of the self [142, 143]. Studies using measures for memory function and the self asked participants to report 20 "I am" self-concepts, thereby collecting concepts/roles significant to their definitions of self [39, 93, 144, 145].

## Theoretical implications

The present systematic review extends the body of knowledge on the reminiscence bump, highlights theoretical accounts giving various explanations for the bump, and supports the use of a variety of methods of identity construction as possible explanations for the bump phenomenon. It shows that varying locations of the bump could be due to different methods of activating memories or differences in memory types. Future research could examine memory functions and the measure of the self, along with the role of SDMs in the association of identity and the bump. New research could also be conducted on the salience of identity in memories, and the significance of goals in SDM formation. The role of SDMs in helping familiarize an individual to age-related changes could be investigated.

The authors highlight a gap in the research for which, if any, theoretical account offers the best explanation for the bump. The reviewed studies do not provide enough evidence to construct a clear understanding of the bump and its location and formation using different types of memory assessments. There is a need to conduct further studies investigating methods of memory activation, different types of memories activated, and theories for the bump, particularly to compare the plausibility of several theoretical accounts simultaneously in a single study. A novel research strategy could be developed for use in a large study to determine if the narrative/identity account, or cultural life script account, better explains the bump.

## Strengths/Limitations

This review provides a foundation for a more transparent understanding of the relative plausibility of theoretical accounts explaining the bump as reflected in the research. Since the temporal location of the bump varies according to memory activation method, the authors present the bump's most widely accepted location. This review includes studies in various languages and geographical locations, and with differing population characteristics and lengths. The researchers conducted an extensive quality assessment exercise for study inclusion.

A limitation of this systematic review is simply the heterogeneity of the pool of studies regarding research design, time period conducted, sample size, sample characteristics, intervention strategies implemented during different time periods, and assessment method. Methods used to examine the bump depend on self-report measures, and cannot be evaluated for accuracy of recall due to the potential for self-report bias, which may influence results. The 14 criteria checklist [55] used to assess the quality of studies with diverse designs has inherent limitations. Although it permits a comparison among studies for quality, it gives no guidance for what score is considered "good," or represents a satisfactory level of internal validity. The authors adopted this checklist based on its use in other published systematic reviews [146, 147].

## Conclusion

This systematic review provides a comprehensive summary of the empirical research on the reminiscence bump published between 1988 and 2017. Findings illustrate that the cuing method and important memories method were widely used to induce memories. Results indicate the overall temporal location of the bump to be between 10–30 years of age for the important memories method, 5–30 years of age for word cuing methods, and 6–39 years of age for studies using life scripts. Both the narrative/identity and cultural life scripts accounts received a fair amount of support in explaining the occurrence of the bump. The authors indicate a need for further research in identifying: (a) the theoretical account offering the most comprehensive explanation for the bump, and (b) the most accurate method(s) of memory activation. The strengths and limitations of both accounts of the bump (i.e., the narrative/identity account

and cultural life script account) and suggestions for future studies are discussed. The current, empirical evidence on the bump summarized in this paper could be valuable for researchers and professionals in the fields of cognitive psychology and neuroscience.

## Supporting information

**S1 Table. Showing Key words and alternative words.** Computer-based searches were conducted to search nine databases. In each search, derivatives of “reminiscence bump” were combined using the Boolean OR operator and wildcards.

(DOCX)

**S2 Table. Databases searched for the systematic review.** A search of nine databases gave a total of 523 research articles.

(DOCX)

**S3 Table. Showing quality assessment of quantitative studies included in this systematic review (n = 68).** The detailed quality assessment of all included studies was carried out through a 14 criteria given by Kmet, Lee, and Cook.

(DOCX)

**S4 Table. PRISMA checklist.** A PRISMA checklist showing various section of this review and page numbers on which these sections are reported.

(DOCX)

**S1 Fig. Geographical distribution of all 68 studies examined in this systematic review.** The clustering of studies on the basis of geographical location shows that most of the studies (n = 19) were conducted in USA.

(TIF)

**S2 Fig. Temporal distribution of all 68 studies examined in this systematic review.** The clustering of included studies in three groups; 1988 to 1999; 2000 to 2010, and 2011 to 2017.

(TIF)

**S1 File. PROSPERO protocol.** Review protocol registered in PROSPERO (International prospective register of systematic reviews).

(PDF)

## Acknowledgments

Dr. Shogo Moriya, Senior Lecturer, BRIMS, Jeffrey Cheah School of Medicine & Health Sciences, Monash University Malaysia for his assistance in reviewing and extracting data from the Japanese research article. Monash University Malaysia is acknowledged for offering a Higher Degree by Research Scholarship to Khadeeja Munawar. The authors also acknowledge Global Asia in the 21<sup>st</sup> Century (GA21) Platform at Monash University Malaysia for the open access publication funding support.

## Author Contributions

**Conceptualization:** Khadeeja Munawar, Shamsul Haque.

**Data curation:** Khadeeja Munawar.

**Formal analysis:** Khadeeja Munawar.

**Funding acquisition:** Shamsul Haque.

**Project administration:** Khadeeja Munawar, Shamsul Haque.

**Supervision:** Shamsul Haque.

**Writing – original draft:** Khadeeja Munawar.

**Writing – review & editing:** Sara K. Kuhn, Shamsul Haque.

## References

1. Rubin DC. The distribution of early childhood memories. *Memory*. 2000; 8(4):265–9. <https://doi.org/10.1080/096582100406810> PMID: 10932795
2. Rubin DC, Wenzel AE. One hundred years of forgetting: A quantitative description of retention. *Psychological review*. 1996; 103(4):734. 00006832-199610000-00006.
3. Rubin DC, Wetzler SE, Nebes RD. Autobiographical memory across the lifespan. In: Rubin DC, editor. *Autobiographical memory*. Cambridge: Cambridge University Press; 1986. p. 202–21.
4. Scherman AZ. Cultural life script theory and the reminiscence bump: A reanalysis of seven studies across cultures. *Nordic Psychology*. 2013; 65(2):103–19. <https://doi.org/10.1080/19012276.2013.807667>
5. Eysenck MW, Keane MT. *Cognitive psychology: a student's handbook*. East Sussex, England: Psychology Press.; 2010.
6. Goldstein EB. *Cognitive psychology: Connecting mind, research, and everyday experience*. 2 ed. Belmont, CA: Thomson Wadsworth.; 2008.
7. Rathbone C, Moulin A, Conway M, Holmes E. Autobiographical memory and the self. *Cognitive psychology*. 2012; 2:546–76.
8. Koppel J, Berntsen D. The peaks of life: The differential temporal locations of the reminiscence bump across disparate cueing methods. *Journal of Applied Research in Memory and Cognition*. 2015; 4(1):66–80.
9. Cappeliez P. An explanation of the reminiscence bump in the dreams of older adults in terms of life goals and identity. *Self and Identity*. 2008; 7(1):25–33. <https://doi.org/10.1080/15298860600934281>
10. Holmes A, Conway MA. Generation identity and the reminiscence bump: Memory for public and private events. *Journal of Adult Development*. 1999; 6(1):21–34.
11. Rubin DC, Rahhal TA, Poon LW. Things learned in early adulthood are remembered best. *Memory & cognition*. 1998; 26(1):3–19. <https://doi.org/10.3758/bf03211366>
12. Crovitz HF, Schiffman H. Frequency of episodic memories as a function of their age. *Bulletin of the Psychonomic Society*. 1974; 4(5):517–8.
13. Galton F. Psychometric experiments. *Brain*. 1879; 2(2):149–62.
14. Janssen SMJ, Rubin DC, St. Jacques PL. The temporal distribution of autobiographical memory: changes in reliving and vividness over the life span do not explain the reminiscence bump. *Memory & Cognition*. 2011; 39(1):1–11. <https://doi.org/10.3758/s13421-010-0003-x> PMID: 21264610
15. Rubin DC, Schulkind MD. Distribution of important and word-cued autobiographical memories in 20-, 35-, and 70-year-old adults. *Psychology and aging*. 1997; 12:524–35. PMID: 9308099
16. Rubin DC, Schulkind MD. The distribution of autobiographical memories across the lifespan. *Memory & cognition*. 1997; 25(6):859–66. <https://doi.org/10.3758/bf03211330>
17. Schuman H, Corning A. Collective memory and autobiographical memory: Similar but not the same. *Memory Studies*. 2014; 7(2):146–60. <https://doi.org/10.1177/1750698013508196>
18. Fitzgerald JM, Lawrence R. Autobiographical memory across the life-span. *Journal of gerontology*. 1984; 39(6):692–8. Epub 1984/11/01. PMID: 6491180.
19. Franklin HC, Holding DH. Personal memories at different ages. *The Quarterly Journal of Experimental Psychology*. 1977; 29(3):527–32. <https://doi.org/10.1080/14640747708400628>
20. Zola-Morgan S, Cohen NJ, Squire LR. Recall of remote episodic memory in amnesia. *Neuropsychologia*. 1983; 21(5):487–500. [http://dx.doi.org/10.1016/0028-3932\(83\)90005-2](http://dx.doi.org/10.1016/0028-3932(83)90005-2). PMID: 6646401
21. Cuervo-Lombard C, Jovenin N, Hedelin GUY, Rizzo-Peter L, Conway MA, Danion J-M. Autobiographical memory of adolescence and early adulthood events: An investigation in schizophrenia. *Journal of the International Neuropsychological Society*. 2007; 13(2):335–43. Epub 02/02. <https://doi.org/10.1017/S135561770707035X> PMID: 17286890
22. Glück J, Bluck S. Looking back across the life span: A life story account of the reminiscence bump. *Memory & cognition*. 2007; 35(8):1928–39.

23. Benson KA, Jarvi SD, Arai Y, Thielbar PR, Frye KJ, McDonald BLG. Socio-historical context and autobiographical memories: Variations in the reminiscence phenomenon. *Theoretical perspectives on autobiographical memory*: Springer; 1992. p. 313–22.
24. Fitzgerald JM. Vivid memories and the reminiscence phenomenon: The role of a self narrative. *Human Development*. 1988; 31(5):261–73. <https://doi.org/10.1159/000275814>
25. Robinson JA, Taylor LR. *Autobiographical memory and self-narratives: A tale of two stories*. 1998.
26. Koppel J. The reminiscence bump for public events: A review of its prevalence and taxonomy of alternative age distributions. *Applied Cognitive Psychology*. 2013; 27(1):12–32. <https://doi.org/10.1002/acp.2865>
27. Schuman H, Rodgers WL. Cohorts, chronology, and collective memories. *Public Opinion Quarterly*. 2004; 68(2):217–54.
28. Schuman H, Scott J. Generations and collective memories. *American sociological review*. 1989; 54(3):359–81.
29. Pillemer DB. Momentous events and the life story. *Review of General Psychology*. 2001; 5(2):123.
30. Janssen SM, Murre JM. Reminiscence bump in autobiographical memory: Unexplained by novelty, emotionality, valence, or importance of personal events. *The Quarterly Journal of Experimental Psychology*. 2008; 61(12):1847–60. <https://doi.org/10.1080/17470210701774242> PMID: 19031155
31. Berntsen D, Rubin DC. Emotionally charged autobiographical memories across the life span: the recall of happy, sad, traumatic, and involuntary memories. *Psychology and aging*. 2002; 17(4):636–52. Epub 2003/01/01. PMID: 12507360.
32. Berntsen D, Rubin DC. Cultural life scripts structure recall from autobiographical memory. *Memory & cognition*. 2004; 32(3):427–42.
33. Rubin DC, Berntsen D. Life scripts help to maintain autobiographical memories of highly positive, but not highly negative, events. *Memory & cognition*. 2003; 31(1):1–14.
34. Conway MA, Holmes A. Psychosocial stages and the accessibility of autobiographical memories across the life cycle. *Journal of personality*. 2004; 72(3):461–80. Epub 2004/04/23. <https://doi.org/10.1111/j.0022-3506.2004.00269.x> PMID: 15102035.
35. Fitzgerald JM. The distribution of self-narrative memories in younger and older adults: Elaborating the self-narrative hypothesis. *Aging, Neuropsychology, and Cognition*. 1996; 3(3):229–36. <https://doi.org/10.1080/13825589608256626>
36. Conway MA. Memory and the self. *Journal of Memory and Language*. 2005; 53(4):594–628. <https://doi.org/10.1016/j.jml.2005.08.005>.
37. Kormi-Nouri R, Nilsson LG, Ohta N. The novelty effect: support for the Novelty-Encoding Hypothesis. *Scandinavian journal of psychology*. 2005; 46(2):133–43. Epub 2005/03/15. <https://doi.org/10.1111/j.1467-9450.2005.00443.x> PMID: 15762941.
38. Piefke M, Fink GR. Recollections of one's own past: the effects of aging and gender on the neural mechanisms of episodic autobiographical memory. *Anatomy and Embryology*. 2005; 210(5):497–512. <https://doi.org/10.1007/s00429-005-0038-0> PMID: 16172875
39. Rose Addis D, Tippett L. Memory of myself: Autobiographical memory and identity in Alzheimer's disease. *Memory*. 2004; 12(1):56–74. <https://doi.org/10.1080/09658210244000423> PMID: 15098621
40. Conway MA, Pleydell-Pearce CW. The construction of autobiographical memories in the self-memory system. *Psychol Rev*2000. p. 261–88. PMID: 10789197
41. McAdams DP. *Identity and the life story*. Mahwah, NJ: Lawrence Erlbaum Associates Publishers; 2003.
42. Power MJ. The multistory self: Why the self is more than the sum of its autoparts. *Journal of Clinical Psychology*. 2007; 63(2):187–98. <https://doi.org/10.1002/jclp.20341> PMID: 17173323
43. Ricarte JJ, Ros L, Latorre JM, Watkins E. Mapping autobiographical memory in schizophrenia: Clinical implications. *Clinical Psychology Review*. 2017; 51(Supplement C):96–108. <https://doi.org/10.1016/j.cpr.2016.11.004>.
44. Schank RC. *Dynamic memory revisited*. New York: Cambridge University Press; 1999.
45. Schank R C, P AR, editors. *Scripts, plan, and knowledge*. Cambridge: Cambridge University Press; 1977.
46. Rubin DC, Berntsen D, Hutson M. The Normative and the Personal Life: Individual Differences in Life Scripts and Life Story Events among U.S.A. and Danish Undergraduates. *Memory (Hove, England)*. 2009; 17(1):54–68. <https://doi.org/10.1080/09658210802541442> PMC3042895. PMID: 19105087
47. Janssen SMJ, Haque S. The transmission and stability of cultural life scripts: a cross-cultural study. *Memory*. 2018; 26(1):131–43. <https://doi.org/10.1080/09658211.2017.1335327> PMID: 28585471

48. Neugarten BL, Moore JW, Lowe JC. AGE NORMS, AGE CONSTRAINTS, AND ADULT SOCIALIZATION. *AJS; American journal of sociology*. 1965; 70:710–7. Epub 1965/05/01. PMID: [14298073](#).
49. Shai D. Working Women/Cloistered Men: A Family Development Approach to Marriage Arrangements among Ultra-orthodox Jews. *Journal of Comparative Family Studies*. 2002; 33(1):97–115.
50. Clarke J. What is a systematic review? *Evidence Based Nursing*. 2011; 14(3):64. <https://doi.org/10.1136/ebn.2011.0049> PMID: [21659560](#)
51. Uman LS. Systematic Reviews and Meta-Analyses. *Journal of the Canadian Academy of Child and Adolescent Psychiatry*. 2011; 20(1):57–9. PMC3024725. PMID: [21286370](#)
52. Moher D, Liberati A, Tetzlaff J, Altman DG, Group P. Preferred reporting items for systematic reviews and meta-analyses: the PRISMA statement. *PLoS med*. 2009; 6(7):e1000097. <https://doi.org/10.1371/journal.pmed.1000097> PMID: [19621072](#)
53. Munawar K, Haque S. The formation and understanding of the reminiscence bump: A systematic review 2017. Available from: [http://www.crd.york.ac.uk/PROSPERO/display\\_record.php?ID=CRD42017076695](http://www.crd.york.ac.uk/PROSPERO/display_record.php?ID=CRD42017076695).
54. Dinet J, Favart M, Passerault J-M. Searching for information in an online public access catalogue (OPAC): the impacts of information search expertise on the use of Boolean operators. *Journal of Computer Assisted Learning*. 2004; 20(5):338–46. <https://doi.org/10.1111/j.1365-2729.2004.00093.x>
55. Kmet LM, Lee RC, Cook LS. Standard quality assessment criteria for evaluating primary research papers from a variety of fields. Alberta Heritage Foundation for Medical Research Edmonton; 2004.
56. Wassenaar A, Schouten J, Schoonhoven L. Factors promoting intensive care patients' perception of feeling safe: A systematic review. *International journal of nursing studies*. 2014; 51(2):261–73. <https://doi.org/10.1016/j.ijnurstu.2013.07.003> PMID: [23910399](#)
57. Stierlin AS, De Lepeleere S, Cardon G, Dargent-Molina P, Hoffmann B, Murphy MH, et al. A systematic review of determinants of sedentary behaviour in youth: a DEDIPAC-study. *International Journal of Behavioral Nutrition and Physical Activity*. 2015; 12(1):133.
58. Dempster M. A research guide for health and clinical psychology. Basingstoke: Palgrave Macmillan; 2011. <https://doi.org/10.1002/jclp.20803>
59. Alea N, Ali S, Marcano B. The bumps in Trinidadian life: Reminiscence bumps for positive and negative life events. *Applied Cognitive Psychology*. 2014; 28(2):174–84.
60. Bohn A, Berntsen D. The reminiscence bump reconsidered: Children's prospective life stories show a bump in young adulthood. *Psychological Science*. 2011; 22(2):197–202. <https://doi.org/10.1177/0956797610395394> PMID: [21193779](#)
61. Chu S, Downes JJ. Long live Proust: The odour-cued autobiographical memory bump. *Cognition*. 2000; 75(2):B41–B50. PMID: [10771279](#)
62. Conway MA, Haque S. Overshadowing the reminiscence bump: Memories of a struggle for independence. *Journal of Adult Development*. 1999; 6(1):35–44.
63. Conway MA, Wang Q, Hanyu K, Haque S. A cross-cultural investigation of autobiographical memory on the universality and cultural variation of the reminiscence bump. *Journal of Cross-Cultural Psychology*. 2005; 36(6):739–49. <https://doi.org/10.1177/0022022105280512>
64. Copeland DE, Radvansky GA, Goodwin KA. A novel study: Forgetting curves and the reminiscence bump. *Memory*. 2009; 17(3):323–36. <https://doi.org/10.1080/09658210902729491> PMID: [19206017](#)
65. Davison IM, Feeney A. Regret as autobiographical memory. *Cognitive psychology*. 2008; 57(4):385–403. <https://doi.org/10.1016/j.cogpsych.2008.03.001> PMID: [18455156](#)
66. Demiray B, Gülgöz S, Bluck S. Examining the life story account of the reminiscence bump: Why we remember more from young adulthood. *Memory*. 2009; 17(7):708–23. <https://doi.org/10.1080/09658210902939322> PMID: [19598057](#)
67. Denver JY, Lane SM, Cherry KE. Recent versus remote: Flashbulb memory for 9/11 and self-selected events from the reminiscence bump. *The International Journal of Aging and Human Development*. 2010; 70(4):275–97. <https://doi.org/10.2190/AG.70.4.a> PMID: [20649160](#)
68. Dickson RA, Pillemer DB, Bruehl EC. The reminiscence bump for salient personal memories: Is a cultural life script required? *Memory & cognition*. 2011; 39(6):977. <https://doi.org/10.3758/s13421-011-0082-3> PMID: [21424878](#)
69. Ece B, Gülgöz S. The impact of suppressing the typical life events on the reminiscence bump. *Applied Cognitive Psychology*. 2014; 28(5):702–10. <https://doi.org/10.1002/acp.3056>
70. Elnick AB, Margrett JA, Fitzgerald JM, Labouvie-Vief G. Benchmark Memories in Adulthood: Central Domains and Predictors of Their Frequency. *Journal of Adult Development*. 1999; 6(1):45–59. <https://doi.org/10.1023/a:1021624324994>



71. Erdoğlan A, Baran B, Avlar B, Taş AÇ, Tekcan AI. On the persistence of positive events in life scripts. *Applied Cognitive Psychology*. 2008; 22(1):95–111. <https://doi.org/10.1002/acp.1363>
72. Fromholt P, Larsen SF. Autobiographical memory in normal aging and primary degenerative dementia (dementia of Alzheimer type). *Journal of Gerontology*. 1991; 46(3):P85–P91. <https://doi.org/10.1093/geronj/46.3.P85>. PMID: 2030279
73. Fromholt P, Mortensen D, Torpdahl P, Bender L, Larsen P, Rubin D. Life-narrative and word-cued autobiographical memories in centenarians: comparisons with 80-year-old control, depressed, and dementia groups. *Memory*. 2003; 11(1):81–8. <https://doi.org/10.1080/741938171> PMID: 12653490
74. Gidron Y, Alon S. Autobiographical memory and depression in the later age: The bump is a turning point. *The International Journal of Aging and Human Development*. 2007; 64(1):1–11. <https://doi.org/10.2190/96L8-6J35-0297-M403> PMID: 17390962
75. Haque S, Hasking PA. Life scripts for emotionally charged autobiographical memories: A cultural explanation of the reminiscence bump. *Memory*. 2010; 18(7):712–29. <https://doi.org/10.1080/09658211.2010.506442> PMID: 20803371
76. Jansari A, Parkin AJ. Things that go bump in your life: Explaining the reminiscence bump in autobiographical memory. *Psychology and aging*. 1996; 11(1):85. PMID: 8726374
77. Janssen S, Chessa A, Murre J. Modeling the reminiscence bump in autobiographical memory with the Memory Chain Model. *Constructive memory*. 2003:138–47.
78. Janssen S, Chessa A, Murre J. The reminiscence bump in autobiographical memory: Effects of age, gender, education, and culture. *Memory*. 2005; 13(6):658–68. <https://doi.org/10.1080/09658210444000322> PMID: 16076679
79. Janssen SM, Chessa AG, Murre JM. Temporal distribution of favourite books, movies, and records: Differential encoding and re-sampling. *Memory*. 2007; 15(7):755–67. <https://doi.org/10.1080/09658210701539646> PMID: 17852723
80. Janssen SM, Murre JM, Meeter M. Reminiscence bump in memory for public events. *European Journal of Cognitive Psychology*. 2008; 20(4):738–64. <https://doi.org/10.1080/09541440701554409>
81. Janssen SM, Gralak A, Murre JM. A model for removing the increased recall of recent events from the temporal distribution of autobiographical memory. *Behavior research methods*. 2011; 43(4):916–30. <https://doi.org/10.3758/s13428-011-0110-z> PMID: 21614661
82. Janssen SM, Rubin DC, Jacques PLS. The temporal distribution of autobiographical memory: changes in reliving and vividness over the life span do not explain the reminiscence bump. *Memory & cognition*. 2011; 39(1):1–11. <https://doi.org/10.3758/s13421-010-0003-x> PMID: 21264610
83. Janssen SM, Rubin DC, Conway MA. The reminiscence bump in the temporal distribution of the best football players of all time: Pelé, Crujff or Maradona? *The Quarterly Journal of Experimental Psychology*. 2012; 65(1):165–78. <https://doi.org/10.1080/17470218.2011.606372> PMID: 21939366
84. Janssen SM. Is There a Cultural Life Script for Public Events? *Applied Cognitive Psychology*. 2015; 29(1):61–8. <https://doi.org/10.1002/acp.3022>
85. Ju I, Choi Y, Morris J, Liao HW, Bluck S. Creating Nostalgic Advertising Based on the Reminiscence Bump: Diachronic Relevance and Purchase Intent. *Applied Cognitive Psychology*. 2016; 30:465–71. <https://doi.org/10.1002/acp.3210>
86. Kawasaki Y, Janssen SM, Inoue T. Temporal distribution of autobiographical memory: Uncovering the reminiscence bump in Japanese young and middle-aged adults1. *Japanese Psychological Research*. 2011; 53(1):86–96. <https://doi.org/10.1111/j.1468-5884.2010.00451.x>
87. Koppel J, Berntsen D. Does everything happen when you are young? Introducing the youth bias. *The Quarterly Journal of Experimental Psychology*. 2014; 67(3):417–23. <https://doi.org/10.1080/17470218.2013.869613> PMID: 24286365
88. Koppel J, Berntsen D. The reminiscence bump in autobiographical memory and for public events: A comparison across different cueing methods. *Memory*. 2016; 24(1):44–62. <https://doi.org/10.1080/09658211.2014.985233> PMID: 25529327
89. Koppel J, Berntsen D. The reminiscence bump without memories: The distribution of imagined word-cued and important autobiographical memories in a hypothetical 70-year-old. *Consciousness and Cognition*. 2016; 44:89–102. <https://doi.org/10.1016/j.concog.2016.06.010> PMID: 27376837
90. Krumhansl CL, Zupnick JA. Cascading reminiscence bumps in popular music. *Psychological science*. 2013; 24(10):2057–68. <https://doi.org/10.1177/0956797613486486> PMID: 24006129
91. Leist AK, Ferring D, Filipp S-H. Remembering positive and negative life events: Associations with future time perspective and functions of autobiographical memory. *GeroPsych: The Journal of Gerontopsychology and Geriatric Psychiatry*. 2010; 23(3):137. <https://doi.org/10.1024/1662-9647/a000017>

92. Platz F, Kopiez R, Hasselhorn J, Wolf A. The impact of song-specific age and affective qualities of popular songs on music-evoked autobiographical memories (MEAMs). *Musicae Scientiae*. 2015; 19(4):327–49. <https://doi.org/10.1177/1029864915597567>
93. Rathbone CJ, Moulin CJ, Conway MA. Self-centered memories: The reminiscence bump and the self. *Memory & cognition*. 2008; 36(8):1403–14. <https://doi.org/10.3758/MC.36.8.1403> PMID: 19015500
94. Rathbone CJ, O'Connor AR, Moulin CJA. The tracks of my years: Personal significance contributes to the reminiscence bump. *Memory & cognition*. 2017; 45(1):137–50. <https://doi.org/10.3758/s13421-016-0647-2> PMID: 27566486
95. Rybash JM, Monaghan BE. Episodic and semantic contributions to older adults' autobiographical recall. *The Journal of general psychology*. 1999; 126(1):85–96. <https://doi.org/10.1080/00221309909595353> PMID: 10216971
96. Schrauf RW, Rubin DC. Bilingual autobiographical memory in older adult immigrants: A test of cognitive explanations of the reminiscence bump and the linguistic encoding of memories. *Journal of Memory and Language*. 1998; 39(3):437–57.
97. Schrauf RW, Rubin DC. Effects of voluntary immigration on the distribution of autobiographical memory over the lifespan. *Applied Cognitive Psychology*. 2001; 15(7). <https://doi.org/10.1002/acp.835>
98. Schubert E. Does recall of a past music event invoke a reminiscence bump in young adults? *Memory*. 2016; 24(7):1007–14. <https://doi.org/10.1080/09658211.2015.1061014> PMID: 26275069
99. Steiner KL, Pillemer DB, Thomsen DK, Minigan AP. The reminiscence bump in older adults' life story transitions. *Memory*. 2014; 22(8):1002–9. <https://doi.org/10.1080/09658211.2013.863358> PMID: 24295374
100. Svob C, Brown NR. Intergenerational transmission of the reminiscence bump and biographical conflict knowledge. *Psychological Science*. 2012; 23(11):1404–9. <https://doi.org/10.1177/0956797612445316> PMID: 23012267
101. Tekcan Aİ, Kaya-Kızıllöz B, Odaman H. Life scripts across age groups: A comparison of adolescents, young adults, and older adults. *Memory*. 2012; 20(8):836–47. <https://doi.org/10.1080/09658211.2012.710431> PMID: 22897157
102. Thomsen DK, Berntsen D. The cultural life script and life story chapters contribute to the reminiscence bump. *Memory*. 2008; 16(4):420–35. <https://doi.org/10.1080/09658210802010497> PMID: 18432486
103. Thomsen DK, Pillemer DB, Ivcevic Z. Life story chapters, specific memories and the reminiscence bump. *Memory*. 2011; 19(3):267–79. <https://doi.org/10.1080/09658211.2011.558513> PMID: 21500087
104. Webster JD, Gould O. Reminiscence and vivid personal memories across adulthood. *The International Journal of Aging and Human Development*. 2007; 64(2):149–70. <https://doi.org/10.2190/Q8V4-X5H0-6457-5442> PMID: 17451043
105. Wolf T, Zimprich D. How can individual differences in autobiographical memory distributions of older adults be explained? *Memory*. 2016; 24(9):1287–99. <https://doi.org/10.1080/09658211.2015.1102291> PMID: 26492840
106. Maki Y, Naka M. Reminiscence bump and contents of autobiographical memory in Japanese elders. *Shinrigaku kenkyu: The Japanese journal of psychology*. 2006; 77(4):333–41. PMID: 17447443
107. Berntsen D, Rubin DC, Siegler I. Two Versions of Life: Emotionally Negative and Positive Life Events Have Different Roles in The Organization of Life Story and Identity. *Emotion*. 2011; 11(5):1190–201. <https://doi.org/10.1037/a0024940> PMID: 21875191
108. Raffard S, D'Argembeau A, Lardi C, Bayard S, Boulenger J-P, Linden MVd. Narrative identity in schizophrenia. *Consciousness and Cognition*. 2010; 19(1):328–40. <https://doi.org/10.1016/j.concog.2009.10.005> PMID: 19955004
109. Schlagman S, Kliegel M, Schulz J, Kvavilashvili L. Differential Effects of Age on Involuntary and Voluntary Autobiographical Memory. *Psychol Aging*. 2009; 24(2):397–411. <https://doi.org/10.1037/a0015785> PMID: 19485657
110. Schroots JJF, Dijkum CV, Assink MHJ. Autobiographical Memory from a Life Span Perspective. *The International Journal of Aging and Human Development*. 2004; 58(1):69–85. <https://doi.org/10.2190/7A1A-8HCE-0FD9-7CTX> PMID: 15248473.
111. Raffard S, D'Argembeau A, Lardi C, Bayard S, Boulenger J-P, Boulenger J-P, et al. Exploring self-defining memories in schizophrenia. *Memory*. 2009; 17(1):26–38. <https://doi.org/10.1080/09658210802524232> PMID: 19105085
112. Cuervo-lombard C, Jovenin N, Hedelin G, Rizzo-peter L, Conway MA, Danion J-m. Autobiographical memory of adolescence and early adulthood events: An investigation in schizophrenia. *Journal of the International Neuropsychological Society: JINS*. 2007; 13(2):335–43. <https://doi.org/10.1017/S135561770707035X> PMID: 17286890; 17286890.

113. Berntsen D, Rubin D. Emotionally charged autobiographical memories across the life span: The recall of happy, sad, traumatic, and inventory memories. *Psychology and aging*. 2002; 17(4):636–52. <https://doi.org/10.1037/0882-7974.17.4.636> PMID: 12507360
114. Maki Y, Janssen SMJ, Uemiyama A, Naka M. The phenomenology and temporal distributions of autobiographical memories elicited with emotional and neutral cue words. *Memory*. 2013; 21(3):286–300. <https://doi.org/10.1080/09658211.2012.725739> PMID: 23215874
115. Popay J, Roberts H, Sowden A, Petticrew M, Arai L, Rodgers M, et al. Guidance on the conduct of narrative synthesis in systematic reviews. A product from the ESRC methods programme Version. 2006; 1:b92.
116. Rybash JM. Aging and autobiographical memory: The long and bumpy road. *Journal of Adult Development*. 1999; 6(1):1–10.
117. Rubin DC. One bump, two bumps, three bumps, four? Using retrieval cues to divide one autobiographical memory reminiscence bump into many. *Journal of Applied Research in Memory and Cognition*. 2015; 4(1):87–9.
118. Cabeza R. Role of parietal regions in episodic memory retrieval: The dual attentional processes hypothesis. *Neuropsychologia*. 2008; 46(7):1813–27. <https://doi.org/10.1016/j.neuropsychologia.2008.03.019> PMID: 18439631
119. Ciaramelli E, Grady CL, Moscovitch M. Top-down and bottom-up attention to memory: A hypothesis (AtoM) on the role of the posterior parietal cortex in memory retrieval. *Neuropsychologia*. 2008; 46(7):1828–51. <https://doi.org/10.1016/j.neuropsychologia.2008.03.022> PMID: 18471837
120. Corbetta M, Shulman G. Control of goal-directed and stimulus-driven attention in the brain. *Nat Rev Neurosci* 2002. p. 201–15. <https://doi.org/10.1038/nrn755> PMID: 11994752
121. Marois R, Leung H-C, Gore JC. A Stimulus-Driven Approach to Object Identity and Location Processing in the Human Brain. *Neuron*. 2000; 25(3):717–28. [https://doi.org/10.1016/S0896-6273\(00\)81073-9](https://doi.org/10.1016/S0896-6273(00)81073-9) PMID: 10774738
122. Ciaramelli E, Grady C, Levine B, Ween J, Moscovitch M. Top-down and bottom-up attention to memory are dissociated in posterior parietal cortex: neuroimaging and neuropsychological evidence. *The Journal of neuroscience: the official journal of the Society for Neuroscience*. 2010; 30(14):4943. <https://doi.org/10.1523/JNEUROSCI.1209-09.2010> PMID: 20371815
123. Hutchinson J, Uncapher M, Wagner AD. Posterior parietal cortex and episodic retrieval: Convergent and divergent effects of attention and memory. *Learn Mem* 2009. p. 343–56.
124. Hsiao-Wen L, Susan B, Gerben JW. Longitudinal Relations Between Self-Defining Memories and Self-Esteem: Mediating Roles of Meaning-Making and Memory Function. *Imagination, Cognition and Personality*. 2017:0276236617733840. <https://doi.org/10.1177/0276236617700590>
125. Berntsen D, Bohn A. Remembering and forecasting: The relation. *Memory & cognition*. 2010; 38(3):265–78. <https://doi.org/10.3758/mc.38.3.265> PMID: 20234017
126. Janssen SMJ, Kristo G, Rouw R, Murre JMJ. The relation between verbal and visuospatial memory and autobiographical memory. *Consciousness and Cognition*. 2015; 31(Supplement C):12–23. <https://doi.org/10.1016/j.concog.2014.10.001>
127. Bohn A. Generational differences in cultural life scripts and life story memories of younger and older adults. *Applied Cognitive Psychology*. 2010; 24(9):1324–45. <https://doi.org/10.1002/acp.1641>
128. Radvansky GA. *Human Memory: Third Edition*. 3 ed. New York: Taylor & Francis; 2017. 674 p.
129. Gallagher S. Philosophical conceptions of the self: implications for cognitive science. *Trends in Cognitive Sciences*. 2000; 4(1):14–21. [https://doi.org/10.1016/S1364-6613\(99\)01417-5](https://doi.org/10.1016/S1364-6613(99)01417-5) PMID: 10637618
130. Erikson EH. *Childhood and society*. New York: W.W. Norton; 1950.
131. Singer JA, Salovey P. The remembered self: emotion and memory in personality. Salovey P, editor. New York: Toronto: Maxwell Macmillan International; 1993.
132. Hockey R. Rate of presentation in running memory and direct manipulation of input-processing strategies. *Quarterly Journal of Experimental Psychology*. 1973; 25(1):104–11. <https://doi.org/10.1080/14640747308400328>
133. Westmacott R, Moscovitch M. The contribution of autobiographical significance to semantic memory. *Mem Cogn*. 2003; 31(5):761–74. <https://doi.org/10.3758/BF03196114>
134. On the nature of autobiographical memory. In: Berntsen D, Rubin DC, editors. *Understanding autobiographical memory: Theories and approaches* New York, NY: Cambridge University Press; 2012. p. 54–69.
135. Rogers TB, Kuiper NA, Kirker WS. Self-reference and the encoding of personal information. *Journal of personality and social psychology*. 1977; 35(9):677. <https://doi.org/10.1037/0022-3514.35.9.677> PMID: 909043

136. Singer JA, Moffitt KH. An Experimental Investigation of Specificity and Generality in Memory Narratives. *Imagination, Cognition and Personality*. 1992; 11(3):233–57. <https://doi.org/10.2190/72A3-8UPY-GDB9-GX9K>
137. Singer JA. *Memories that matter: How to use self-defining memories to understand and change your life*. Oakland: New Harbinger Publications; 2005.
138. Blagov PS, Singer JA. Four Dimensions of Self-Defining Memories (Specificity, Meaning, Content, and Affect) and Their Relationships to Self-Restraint, Distress, and Repressive Defensiveness. *Journal of personality*. 2004; 72(3):481–511. <https://doi.org/10.1111/j.0022-3506.2004.00270.x> PMID: 15102036
139. Moffitt KH, Singer JA. Continuity in the Life Story: Self-Defining Memories, Affect, and Approach/Avoidance Personal Strivings. *Journal of personality*. 1994; 62(1):21–43. <https://doi.org/10.1111/j.1467-6494.1994.tb00793.x>
140. Skowronski JJ, Ritchie TD, Walker WR, Betz AL, Sedikides C, Bethencourt LA, et al. Ordering our world: the quest for traces of temporal organization in autobiographical memory. (Report). *Journal of Experimental Social Psychology*. 2007; 43(5):850–6. <https://doi.org/10.1016/j.jesp.2006.10.001>
141. Conway MA, Singer J, Tagini A. The self and autobiographical memory: Correspondence and coherence. *Soc Cogn* 2004. p. 491–529.
142. Pillemer D. Directive functions of autobiographical memory: The guiding power of the specific episode. *Memory*. 2003; 11(2):193–202. <https://doi.org/10.1080/741938208> PMID: 12820831
143. Bluck S, Glück J. Making Things Better and Learning a Lesson: Experiencing Wisdom Across the Lifespan. *Journal of personality*. 2004; 72(3):543–72. <https://doi.org/10.1111/j.0022-3506.2004.00272.x> PMID: 15102038
144. Kuhn MH, McPartland TS. An Empirical Investigation of Self-Attitudes. *American Sociological Review*. 1954; 19(1):68–76. <https://doi.org/10.2307/2088175>
145. Madson L, Trafimow D. Gender Comparisons in the Private, Collective, and Allocentric Selves. *The Journal of Social Psychology*. 2001; 141(4):551–9. <https://doi.org/10.1080/00224540109600571> PMID: 11577852
146. Czekierda K, Banik A, Park CL, Luszczynska A. Meaning in life and physical health: systematic review and meta-analysis. *Health Psychology Review*. 2017; 11(4):387–418. <https://doi.org/10.1080/17437199.2017.1327325> PMID: 28488471
147. Gabriel MG, Wakefield CE, Vetsch J, Karpelowsky JS, Darlington A-SE, Grant DM, et al. The Psychosocial Experiences and Needs of Children Undergoing Surgery and Their Parents: A Systematic Review. *Journal of Pediatric Health Care*. 2017. <https://doi.org/10.1016/j.pedhc.2017.08.003>
